# Supplementary material for: SNP/InDel-Based GWAS Reveals QTNs and Candidate Genes for Seed Oil and Protein Content in Northern China Soybean Core Accessions
Source: Research Square preprint supplement (doi:10.21203/rs.3.rs-8169697/v1), 2025-12-19
Supplement: Supplementary file 1 [file 6bd5c18dde443ffed34f2235.xlsx]

## Sheet: Table S1
Table S1 Number, name, origins, bacnkground and the oil and protein contents phenotypic data of 334 soybean accessions.
No.	Name	Origin	Background	Protein (%)				Oil (%)
				2020 year	2021 year	2022 year	2023 year	2020 year	2021 year	2022 year	2023 year
JAAS_C001	heihe 25	Heilongjiang Province	cultivar	42.1667	41.1667	38.7667	40.9667	21.7333	21.0667	21.0667	22.1
JAAS_C002	dongnong 44	Heilongjiang Province	cultivar	44.2	44.0667	42.7667	44.0667	20.7333	21.2667	21.4333	21.7
JAAS_C003	heihe 35	Heilongjiang Province	cultivar	43.9333	41.9333	43.1	44.1	21.6667	21.7667	21.0333	21.7667
JAAS_C004	heihe 13	Heilongjiang Province	cultivar	44.1333	42.0667	42	40.8333	21.2	21.4	21.1667	22.7333
JAAS_C005	heihe 29	Heilongjiang Province	cultivar	43.6333	44.9667	42.1667	41.7667	20.6	19.9667	21.0333	21.4333
JAAS_C006	heihe 31	Heilongjiang Province	cultivar	41.4333	43.1667	41.3667	41	22	20.4667	21.3667	21.7667
JAAS_C007	heihe 14	Heilongjiang Province	cultivar	42.9333	43.2667	41.5	42.8333	21.0333	21.0333	21.2	21.4667
JAAS_C008	suinong 15	Heilongjiang Province	cultivar	43.3333	42.2	42.1667	41.1667	21	21.5333	21.3333	22.8
JAAS_C009	heihe 27	Heilongjiang Province	cultivar	42.6333	42.4667	41.5333	40.8667	21.6	21.2667	21.3	21.9
JAAS_C010	beifeng 11	Heilongjiang Province	cultivar	43.6333	45.9667	42.2	43.1	20.8333	20.0667	20.9333	21.8333
JAAS_C011	hefeng 30	Heilongjiang Province	cultivar	41.7333	42.7667	43	42.2	21.5333	20.9	20.9667	21.8667
JAAS_C012	beifeng No.9	Heilongjiang Province	cultivar	40.4333	40.3667	42.5333	41.5667	22.0667	21.5667	21.5	22.0667
JAAS_C013	heihe 11	Heilongjiang Province	cultivar	41.1667	42.2	40.9667	40.9	21.9667	21.6667	21.7667	22.3333
JAAS_C014	jiyu 67	Jilin Province	cultivar	43.0667	42.5	41.7	41.7	21.2667	21.0667	20.9333	21.9333
JAAS_C015	heihe No.4	Heilongjiang Province	cultivar	42.4333	42.1333	42.1333	41.6667	21	19.8667	20.9	21.2333
JAAS_C016	hefeng 24	Heilongjiang Province	cultivar	41.6333	42.3667	39.8667	42.3	21.8	21.0667	21.1	21.7
JAAS_C017	suinong No.1	Heilongjiang Province	cultivar	39.8667	41.9	38.5333	37.7333	22.0667	21.2667	21.8667	23.5333
JAAS_C018	heinong 44	Heilongjiang Province	cultivar	42.5333	45.2667	43.0667	44.1	21.3333	20.8	20.7667	21.1
JAAS_C019	helongyoutai	Jilin Province	landrace	43.0667	43.8	43.5	44.1	21.3667	20.9	20.9667	21.1333
JAAS_C020	kebei No.1	Heilongjiang Province	cultivar	42.3667	42.6333	40.2667	40.6	21.3667	21.5333	21.2333	22.1667
JAAS_C021	hefeng 35	Heilongjiang Province	cultivar	42.6	42.5	41.6667	41.6	21.5667	21.5667	21.6333	21.1667
JAAS_C022	mengdou 12	Inner Mongolia	cultivar	44.7	44.8	42.7667	42.9	20.8333	20.0667	20.7	21.7
JAAS_C023	hefeng 25	Heilongjiang Province	cultivar	42.8667	44.6333	41.7	41.5	21.4333	20.8333	21.4	22.4
JAAS_C024	suinong 14	Heilongjiang Province	cultivar	40.9	43.5333	40.1333	39.1	21.4	20.6667	21.5667	23.0667
JAAS_C025	yanqihuangdou	Xinjiang Uygur Autonomous Region	landrace	40.7333	44.7667	41.6333	39.6667	21.9667	20.6667	21.1667	21.6667
JAAS_C026	heihe 44	Heilongjiang Province	cultivar	41.6667	43.9333	42.2333	43.1	21.7	20.6667	21	21.4333
JAAS_C027	suinong No.10	Heilongjiang Province	cultivar	40.2	40.4	39.6333	40.2	22.2667	22.3333	21.9	23.1667
JAAS_C028	hefeng 52	Heilongjiang Province	cultivar	43.4	42.9333	41.1667	43.1667	20.7	20.1	20.1667	21.0667
JAAS_C029	longquandadou	Heilongjiang Province	landrace	42.2333	44.2	43.5667	44.3667	21.3	19.5333	20.5667	21.4333
JAAS_C030	fengshou No.6	Heilongjiang Province	cultivar	42.3	44	41.9333	42.4333	21.4	20.5333	20.5	21.2
JAAS_C031	zihua No.4	Heilongjiang Province	landrace	41.4333	40.3333	39.9333	39.1	21.2333	20.5333	21.5333	21.6
JAAS_C032	gongye 03-5570	Jilin Province	cultivar	43.5333	43.9	42.9	42.5333	21.3	21.1333	20.8667	21.3667
JAAS_C033	chasedou	Jilin Province	landrace	49.1667	48.8667	45.2	47.1	17.5333	17.5	18.9333	18.1667
JAAS_C034	gongye 04L-141	Jilin Province	cultivar	40.8	40.9	39	40.4	21.2667	21	21.0333	21.7333
JAAS_C035	jilin 20	Jilin Province	cultivar	41.2333	43.3333	41.6667	42.4667	21.8333	20.9667	21.0667	22.0333
JAAS_C036	gongye 04-L15	Jilin Province	cultivar	39.5	42.3333	38.9667	41.1333	22.2333	21.0667	21.1333	22.3333
JAAS_C037	mengdou No.9	Inner Mongolia	cultivar	43.0667	45.4	42.3333	44.7333	19.5	18.4333	19.1	19.2667
JAAS_C038	gongye 5056	Jilin Province	cultivar	38.6	40.7333	38.2667	39.5333	21.8333	21.2667	21.4667	22.1
JAAS_C039	jiyu 35	Jilin Province	cultivar	39.9	41.4	41.2667	40.9	21.6333	21.2333	21.2	21.8
JAAS_C040	jiyu 39	Jilin Province	cultivar	38.8333	41.4333	39.7667	38.8	22.0333	20.5667	21.0333	22.4667
JAAS_C041	jiunong 21	Jilin Province	cultivar	39.3	41.1333	38.0667	39.6667	21.6667	20.7	21.0667	22.1
JAAS_C042	gongye 03-7239	Jilin Province	cultivar	42	43.0667	39.2333	40.3	21.3667	20.8	21.1333	22.3
JAAS_C043	jiyu 93	Jilin Province	cultivar	41.7667	42.8333	40.9333	42.2333	20.3667	20.1333	20.3333	20.8
JAAS_C044	tiejiasilihuang	Jilin Province	landrace	42.5333	43.9333	42.3	43.5667	21.5333	21.2333	20.8333	21.4667
JAAS_C045	huangbaozhu	Heilongjiang Province	landrace	43.3	41.8333	40.8	43.1667	20.4	19.8333	20.0667	21.0667
JAAS_C046	jiyu 66	Jilin Province	cultivar	42.3	44.6	41.2333	41.7	21.1	21.0333	21.5	22.1333
JAAS_C047	shidadou No.1	Xinjiang Uygur Autonomous Region	cultivar	44.8333	47.0333	43.2667	45.5667	18.4333	18.1	19.3333	18.1667
JAAS_C048	changjihuangdou	Xinjiang Uygur Autonomous Region	landrace	43.1	43.8	42.8	44.2667	21.2333	21	20.7333	21.1
JAAS_C049	mengdou14	Inner Mongolia	cultivar	42.9667	44.3333	42.4667	42.0667	20.6333	20.8333	20.6333	21.7667
JAAS_C050	xindadou No.1	Xinjiang Uygur Autonomous Region	cultivar	44.4667	45.6333	43.5333	44.5	20.3667	20	20.0333	20.8
JAAS_C051	fengdihuang	Jilin Province	cultivar	42.0333	44.7	41.8333	43.1333	21.1333	20.2667	20.7	21.3667
JAAS_C052	huaidebaihuadadou	Jilin Province	landrace	50.9	51.7667	48.6333	51.1333	16.3667	17.7667	18.0333	18.3667
JAAS_C053	jilinchalihua	Jilin Province	landrace	40.7333	42.5667	40.3333	42.3333	22.3	20.9	21.3	21.7
JAAS_C054	nenfeng 11	Heilongjiang Province	cultivar	40.1667	43.9667	42.1333	43.1667	20.8	19.9333	20.5667	21.1333
JAAS_C055	tongnong 13	Jilin Province	cultivar	42.7	42.9	41.6667	42.4	19.7	19.9667	19.5	20.9
JAAS_C056	jilin 30	Jilin Province	cultivar	44.5333	47.4667	44.7333	44.1	20.5333	19.3333	19.5667	20.7333
JAAS_C057	jinzhou 4-1	Liaoning Province	landrace	40.6	41.8667	41.3	41.7667	22.2667	22	21.6667	22.1333
JAAS_C058	dongnong 47	Heilongjiang Province	cultivar	40.2	43.4333	41.6333	40.8	21.2	19.2667	19.3667	21.5
JAAS_C059	jiyu 71	Jilin Province	cultivar	40.1667	44.1667	42.2333	43.4333	21.8	20.8	21.1	21.2667
JAAS_C060	yuanbaojin	Heilongjiang Province	landrace	41.1333	42.6	41.6667	42.1333	22.0333	20.5667	21.2	22.3333
JAAS_C061	kenfeng 16	Heilongjiang Province	cultivar	41.0333	43.5	41.3667	41.7	20.8333	19.7667	20.2333	21.1333
JAAS_C062	tiefeng No.8	Liaoning Province	cultivar	43.4333	45	45.8	43.8	19.2	19.5	17.7	19.1
JAAS_C063	baichengshichangmoshidou	Jilin Province	landrace	42.8333	44.2	45.6	45.2	21.1667	20.3333	20.3	21.2333
JAAS_C064	dongda No.2	Heilongjiang Province	cultivar	42.2333	43.3667	42.3	42.7333	21.1333	19.9333	20.1667	21.4667
JAAS_C065	fengjiao 66-22	Liaoning Province	cultivar	42.8	44.1333	43.5333	42.5333	18.2667	18.1667	18.3	18.7
JAAS_C066	huangqi	Liaoning Province	landrace	41.5	43.1667	42.4667	43.0333	21.2333	19.8	20.6667	21.1333
JAAS_C067	jindou 33	Liaoning Province	cultivar	42.7	44	42.7667	43.2	20.8	20.0667	20	20.8667
JAAS_C068	niumaohuang (1)	Jilin Province	landrace	43.5	44.2333	43.7	43.7333	19.6667	19.9667	19.4667	21.2
JAAS_C069	niumaohuang (2)	Liaoning Province	landrace	43	44.4667	43.3667	42.7667	20.6333	20.3	20.7	21.2333
JAAS_C070	panshidou	Jilin Province	landrace	46.0333	43.6667	44.8333	44.0667	17.4333	19.1333	18.9	20.1667
JAAS_C071	tianerdan	Liaoning Province	landrace	41.7	45.1	40.9667	42.7333	19.6	19.8333	20.2	21.1333
JAAS_C072	tie 5621	Liaoning Province	cultivar	42.6	44.1667	43.1333	43.1889	20.2	20.0333	19.8333	20.8444
JAAS_C073	tiefeng 29	Liaoning Province	cultivar	42.5333	42.2667	41.4	41.8333	21.6667	20.7333	21.1	21.9667
JAAS_C074	tailaisilidou	Heilongjiang Province	landrace	40.8	42.9667	41.0667	40.8	20.9333	20.3	20.1667	21.8667
JAAS_C075	nonganpingdingsi	Jilin Province	landrace	42.8333	45	42.4	43.6	20.9	19.9667	20.2333	21.1
JAAS_C076	fusonghuangdadou	Jilin Province	landrace	41.7667	43.5333	40.5333	40.9667	20.5	20.4333	20.4333	21.6
JAAS_C077	qunxuan No.1	Jilin Province	cultivar	41.8667	43.0333	42.4333	42.7333	20.1333	19.8667	20.2	20.3667
JAAS_C078	shuangliaochadou	Jilin Province	landrace	40.2	42.9333	40.4333	41.2667	21.4	20.8667	21.2333	21.7667
JAAS_C079	shulanshuilizhan	Jilin Province	landrace	42.0333	42.7333	39.4333	40.8333	21.2333	20.6333	20.9	21.9667
JAAS_C080	jiaohexiaolihuang	Jilin Province	landrace	44.6333	44.7	44.0333	43.1667	19.6	19.9333	20.5	20.9333
JAAS_C081	tonghuapingdinghuang	Jilin Province	landrace	45.2	46.0667	44.2	46.9667	20.0667	18.6333	20.1667	19.1333
JAAS_C082	suiwudabaishoumei	Heilongjiang Province	landrace	43.7667	44.2333	43.3667	43.3667	20.3333	19.2333	20.3667	20.1667
JAAS_C083	dongfengyoudou	Jilin Province	landrace	42.4	44.1	41.2333	43.6667	20.9333	19.9667	20.6	21.3333
JAAS_C084	linjiangdalihuang	Jilin Province	landrace	39.9	41.2	38.1333	39.0667	21.7667	21.4667	21.7333	22.5333
JAAS_C085	qianguozihualanqi	Jilin Province	landrace	41.0667	43.4333	41.6667	40.0667	21.6	21.0667	21.0333	22.7667
JAAS_C086	wangqingbarengou	Jilin Province	landrace	40.5667	39.1667	38.9	41.3667	21.7	22.1667	21.5333	22.2
JAAS_C087	shuangyangzaohuangdou	Jilin Province	landrace	41.1667	44.2667	42.4	42.2333	21.5333	20.4667	21.1667	21.7667
JAAS_C088	juitaibaihuadou	Jilin Province	landrace	44.1	47	44.1667	44.3	20.5667	19.8	20.4333	21.1333
JAAS_C089	beianxibeiwa	Heilongjiang Province	landrace	43.4333	45.6667	43.7333	44.8667	20.7333	20.1667	20.5	20.7
JAAS_C090	antuzihualvdadou	Jilin Province	landrace	43.4333	45.9333	43.1	44.1667	21	19.8667	20.7667	21.6333
JAAS_C091	qingpi (1)	Liaoning Province	landrace	42.1667	44.1667	43.6333	42.6	21.2667	20.1667	21.0667	21.8
JAAS_C092	bolidalihuang	Heilongjiang Province	landrace	42.7	44.3667	42.8333	43.7333	20.9333	20.3333	20.8333	21.7
JAAS_C093	achengdadou	Heilongjiang Province	landrace	41.3	42.2	39.7333	41.9667	22.1333	21.3333	21.0333	22.3333
JAAS_C094	hulinlaotaitaitiao	Heilongjiang Province	landrace	42.2333	43.8	42.2333	43.1	20.7333	20.1	20.4	21.4667
JAAS_C095	wodou	Heilongjiang Province	landrace	42	46	41.7667	43.1667	20.3667	19.8333	20.5667	21.1333
JAAS_C096	hailongzhugandou	Jilin Province	landrace	42.2	43.7333	42.4667	44.4333	20.6333	19.9333	20.1333	21.0333
JAAS_C097	baiqixiaojinhuang	Heilongjiang Province	landrace	41.1667	41.4	40.4667	42.2333	21.7667	21.3	21.0667	22.1
JAAS_C098	zhaozhouxiaolihuang	Heilongjiang Province	landrace	42.5333	43.1	41.8	42.3667	21.2667	20.3667	20.7333	21.6
JAAS_C099	dadouwang	Heilongjiang Province	landrace	44.5333	45.3333	43.1333	44.9	19.6667	19.6667	20.4333	20.5667
JAAS_C100	baike	Heilongjiang Province	landrace	44.1333	47.5	45.4	45.8	19.9333	19	19.9333	19.9
JAAS_C101	hedajinhuang	Jilin Province	landrace	40.8	42.5	41.5333	43	21.3	20.4	20.5	22.1
JAAS_C102	qianjinhuang	Heilongjiang Province	landrace	42.8	45.3333	42.1	42.0333	19.9	19.0667	19.3667	20.9333
JAAS_C103	huadianzihuatiaotiaodou	Jilin Province	landrace	42.7333	44.7	43.1	43.5	21.2667	20.6667	20.7333	21.4667
JAAS_C104	shulanmancangjin	Jilin Province	landrace	44.0667	45.4	43.3667	43.8667	20.7667	19.9	19.6333	21.3333
JAAS_C105	huangdou	Jilin Province	landrace	45.3	46.4	44.8667	45.9667	20.5667	19.1333	20.3667	20.1667
JAAS_C106	qinganxiaojindou	Heilongjiang Province	landrace	44.0333	45.5333	44.3667	44.5	20.6333	19.3	19.9667	20.5333
JAAS_C107	baimei	Heilongjiang Province	landrace	41.4	43.2	40.4	41.2	21.1	20.6667	20.4667	21.2333
JAAS_C108	xiaobaiqi	Liaoning Province	landrace	39.5667	43.4667	41.9667	43.2333	20.4667	20.5667	20.7667	21.1667
JAAS_C109	xiaodou	Heilongjiang Province	landrace	43	43.8667	43.1667	43.8667	21.2	20.7333	21	21.7333
JAAS_C110	qinggangdadou	Heilongjiang Province	landrace	45.0333	47.8333	44.7333	44.1	20	19.7333	20.1667	20.9
JAAS_C111	baichengdali	Jilin Province	landrace	41.4	45.1	43.0333	44.3333	20.3	19.5	20.0333	21.1
JAAS_C112	xiaoyoudou	Liaoning Province	landrace	40.9	42.4333	41.5333	42.1333	21.5	20.9333	20.9333	21.5667
JAAS_C113	yongfengdou	Heilongjiang Province	landrace	43.5667	44.7333	41.3667	43.5	20.1667	19.3333	20.3	20.8
JAAS_C114	liuyedou	Jilin Province	landrace	40.0667	42.5333	41.9	43.2333	20.4333	21.0333	20.1667	21.3
JAAS_C115	baipidou	Liaoning Province	landrace	40.6333	42.6667	41.3333	40.2333	21.2	20.6333	21.2	22.2667
JAAS_C116	wuchangdou	Heilongjiang Province	landrace	46.0333	46.2667	46	46.1	20.1667	19.6	19.5	20.2
JAAS_C117	huananxiaojinhuang	Heilongjiang Province	landrace	42.4	44.4667	40.8	44.2	21.0333	20.7	21.3667	21.2667
JAAS_C118	hailinbaihuadou	Heilongjiang Province	landrace	42	45.7333	43.1667	45.0667	20.8333	20.6333	20.7667	21.2
JAAS_C119	hailonglvpidou	Jilin Province	landrace	43.5667	44.3333	42.1	45.2667	20.8667	20.5667	20.5	21.3333
JAAS_C120	huananyiwofeng	Heilongjiang Province	landrace	39.2	42.2333	40.0667	41.7333	22.4333	21.1667	21.6	22.1333
JAAS_C121	qishibaimei	Heilongjiang Province	landrace	43.4	43.4333	43.1	43.5	21.5667	20.9333	21.0667	21.1333
JAAS_C122	lanxidou	Heilongjiang Province	landrace	41.2	41.3333	39.6	42.1333	21.7667	21.1667	21.5333	22.2
JAAS_C123	youhulu	Liaoning Province	landrace	42.6667	43.9333	42.0333	43.4333	20.7667	20.3	20.7667	21.3
JAAS_C124	jiajiedadou	Heilongjiang Province	landrace	47.4667	46.7667	43.6667	45.9333	18.5667	19.8	20.4333	21
JAAS_C125	xiaohuiqi	Heilongjiang Province	landrace	42.8	43.2333	43.3	43.1333	20.7	20.3	20.7	21.3667
JAAS_C126	huangzhongge	Heilongjiang Province	landrace	45.4667	44.4333	42.4333	44.1	20.4667	20.7333	20.8667	21.6333
JAAS_C127	zaodou	Jilin Province	landrace	44.4	45.4	42.8333	45.1333	20.3	19.6667	20.2667	20.1667
JAAS_C128	zihuacuozi	Jilin Province	landrace	42.7333	43.7	44	44.5	20.1333	20.2	19.2	20.1667
JAAS_C129	huitiejia	Jilin Province	landrace	42.9667	44.6333	42.9667	41.9667	20.3	19.6333	19.7	21.4333
JAAS_C130	xiaohuangqi	Heilongjiang Province	landrace	42.7333	43.4	43.9	44.5	20.7333	20.4667	20.3667	20.8
JAAS_C131	liushitianhuanjia	Heilongjiang Province	landrace	42.2	43.8667	42.6667	40.7	20.1333	20.2333	21.1667	22.2333
JAAS_C132	huangqidou	Jilin Province	landrace	40.3667	45.4667	42	43.3333	20.5667	20.2333	20.0667	20.6333
JAAS_C133	suoyiling	Jilin Province	landrace	43.5667	45.7	43.6	43.9	21.3	20.8	20.9333	21.2
JAAS_C134	tianedan	Heilongjiang Province	landrace	44.8667	48.1333	44.7667	45.4	20.0667	19.3	20.3	21.2667
JAAS_C135	dabaimei	Inner Mongolia	landrace	41.5	45.7	44.3333	45.8667	20.8333	19.9333	20.2333	20.4667
JAAS_C136	yapoche	Jilin Province	landrace	44.6667	46.3	45.7333	44.4	19.9333	20.3333	19.7667	21.1
JAAS_C137	baiqi	Jilin Province	landrace	44.0667	46.1	45.4667	45.3333	20.4667	19	19.1	20.1
JAAS_C138	muleng 60 tianhuanjia	Heilongjiang Province	landrace	43.2	43.4333	43.2333	44.1333	20.9667	20.5333	20.2333	21.3333
JAAS_C139	ningfengdou	Heilongjiang Province	landrace	42.8333	44.4667	43.9	43.9333	21.0667	20.1333	20.2	21.7333
JAAS_C140	huijiazi	Jilin Province	landrace	42.0667	42.8667	42.7	42.1667	21.1333	20.8667	20.4	21.1667
JAAS_C141	yanghuangdou	Liaoning Province	landrace	46.2667	48.9333	46.4333	47.1333	20.2667	18.7667	19.3	20.3667
JAAS_C142	fangzhengbailoudou	Heilongjiang Province	landrace	41.2333	44.3333	41.9667	38.6333	20.4	20.7	20.0667	22.3667
JAAS_C143	huangjinyuan	Liaoning Province	landrace	42.4667	45.1	43.5667	43.5667	20.5667	20.3333	19.7667	21.3667
JAAS_C144	tiejiazi	Jilin Province	landrace	43.9	44.5333	42.6333	43.4333	21	20.4	20.9333	21.6667
JAAS_C145	antuniumaohuang	Jilin Province	landrace	43.8	43.4667	43.3333	43.3	20.7333	21.0667	20.6	21.6667
JAAS_C146	zhangdehengdadou	Heilongjiang Province	landrace	41.2	43.4	41.9667	42.2333	20.8667	19.7	20.0333	21.1333
JAAS_C147	xiaobaidou	Jilin Province	landrace	40	41.1	41.7667	41.6667	21.8333	21.9667	20.5	21.9667
JAAS_C148	mancangjin	Liaoning Province	landrace	42.1667	43.7333	43	42.8667	21.8667	20.9333	20.9	21.8
JAAS_C149	jinmandadou	Heilongjiang Province	landrace	38.6667	42.1	42.2667	41.4	22.8333	21.8667	20.8333	22.1667
JAAS_C150	heijinyuan	Heilongjiang Province	landrace	42.4333	44.6	42.4333	43.3	20.8667	20.0667	20.6333	21.1333
JAAS_C151	silihuang	Liaoning Province	landrace	42	43.6	41.7333	42.5333	20.9667	20.4667	20.2667	21.4667
JAAS_C152	heinong 24	Heilongjiang Province	cultivar	44.5	46	45.0333	46.3	20.3667	20.1333	20.5667	20.3
JAAS_C153	qinggangsiliding	Heilongjiang Province	landrace	44.4	44.5667	43.1667	44.2	20.4667	20.2333	20.6333	21.4
JAAS_C154	qingdadou	Heilongjiang Province	landrace	42.2333	41.5	40.4	38.9667	21.2333	21.1	21.1667	22.4667
JAAS_C155	zhangbaodadou	Heilongjiang Province	landrace	43.9333	44.6667	43.2	43.4333	19.8	20.2	20.3	21.0667
JAAS_C156	heiqi	Liaoning Province	landrace	40.1333	43.7	40.3	42.7667	21.3	20.5333	20.8333	22
JAAS_C157	dajinhuang	Heilongjiang Province	landrace	41.2333	44.2333	42.0333	42.3333	21.9333	21.1333	20.8	22.1
JAAS_C158	zhaonong No.1	Heilongjiang Province	landrace	44.6333	47.2	43.9	44.4333	20.2333	19.6667	20.6333	20.4333
JAAS_C159	nenjiangpingdingxiang	Heilongjiang Province	landrace	44.5333	44.8333	44.1667	43.7667	20.5333	20.2667	21.1	21.0667
JAAS_C160	dongliaowuming	Jilin Province	landrace	43.0333	45.6	45.2	46.1667	21.3	20.1333	20.0667	21.2
JAAS_C161	xaobaimao	Heilongjiang Province	landrace	43.3667	46.1667	45.2667	45.5333	21.1333	20.6	20.6	21.1333
JAAS_C162	yushuchangchadou	Jilin Province	landrace	42.6	44.7667	43.9333	41.2333	20.9333	20.1	20.3	21.7333
JAAS_C163	guanshisuo	Heilongjiang Province	landrace	44.1333	44.9	44.0667	45.9	21	20.1333	19.6	20.7333
JAAS_C164	bolibaihuacuo	Heilongjiang Province	landrace	42.5	44	42.6667	43.2333	20.8	20.7667	20.2667	21.4
JAAS_C165	jilintiejiadou	Jilin Province	landrace	40.9	44.1333	39.8333	40.2	21.5667	20.2667	20.6667	22.3667
JAAS_C166	heitiejia	Liaoning Province	landrace	43	42.9667	43	44.9333	20.4667	20.4667	20.7667	20.2667
JAAS_C167	tongbeixiaojinhuang	Heilongjiang Province	landrace	41.9667	44.9333	41.6667	42.4667	21	20.6333	21.2	21.5667
JAAS_C168	jinyu No.5	Liaoning Province	landrace	41.7667	44.8	43.4333	44.0667	20.9667	19.7333	20.1	20.4
JAAS_C169	danzhidou	Heilongjiang Province	landrace	41.0333	43.7	41.2667	41.7667	21.8	20.4333	20.9	21.7667
JAAS_C170	guoyu 100-4	Jilin Province	landrace	41.7	45.7	43.5333	43.3	20.9667	20.3	19.9667	21.6333
JAAS_C171	zhaoyuanzihuacuozi	Heilongjiang Province	landrace	41.9	43.7333	43.0333	41.8667	21.1667	21.2333	20.9667	22.1333
JAAS_C172	hongfeng No.3	Heilongjiang Province	cultivar	41.5333	46.4667	43.7667	45.1667	20.1667	18.7	19.6667	20.7
JAAS_C173	niumaohuang (3)	Liaoning Province	landrace	43.7667	44.0333	43.8667	44.1	20.8	20.1333	20.2667	21.4667
JAAS_C174	ganzhimi	Heilongjiang Province	landrace	44.4333	46.0667	43.0667	43.3333	20.8667	19.5333	20.8667	21.4667
JAAS_C175	suihuasilihuang	Heilongjiang Province	landrace	42.5	44.9	43.4	42.5333	21.0333	20	20.8	22.1333
JAAS_C176	helongzaoshudou	Jilin Province	landrace	44.5333	45.2333	44.4	43.6	20.0667	18.9	19.5333	20.4667
JAAS_C177	baimao	Liaoning Province	landrace	43.4667	42.4333	39.0333	41.4333	20.9667	20.7333	22.3	21.7667
JAAS_C178	zihua No.3	Jilin Province	landrace	42.0333	44.9333	42.9667	42.7333	20.9	20	20.6333	21.5333
JAAS_C179	baiqidou	Liaoning Province	landrace	42.6333	47.1667	42.5	43.2	20.7667	20.0667	20.9333	21.1667
JAAS_C180	shuangsedou	Heilongjiang Province	landrace	41.4	41.1667	40.2333	39.3333	20.7667	19	19.9	21.8
JAAS_C181	jifeng No.2	Jilin Province	cultivar	41.8667	42.0333	40.4667	40.7	21.0667	20.3333	19.9333	21.3333
JAAS_C182	tiejiaqing	Heilongjiang Province	landrace	42.1333	42.9	41.6333	40.9333	21.2	21.1333	20.7333	22.2667
JAAS_C183	wangqingjiguan	Jilin Province	landrace	40.9667	41.1667	42.1667	41.9333	22.0333	21.0333	21	22.4667
JAAS_C184	jiyu 76	Jilin Province	cultivar	40.2333	42.2	41.2	41.7333	22.5	20.9333	21.8333	22
JAAS_C185	jiyu 87	Jilin Province	cultivar	41.1333	42.5333	41.9667	40.3667	21	20.7333	20.6333	22.1333
JAAS_C186	jiyu 88	Jilin Province	cultivar	40.8	43	40.9333	39.8333	21.3	20.7	20.6333	22.1333
JAAS_C187	jiyu 92	Jilin Province	cultivar	42.0667	42.9667	42.1333	40.9	21.2333	20.6667	20.6333	22.3
JAAS_C188	jiyu 93	Jilin Province	cultivar	38.5667	41.8	41.1333	39.5667	22.2667	21.5333	20.8667	22.8667
JAAS_C189	jiyu 99	Jilin Province	cultivar	39.6	41.8667	40.2333	39.5667	21.7333	20.4667	20.5	22.2667
JAAS_C190	jiyu 100	Jilin Province	cultivar	41.7	44.4333	41.7	41.8667	19.8	19.7	19.3333	21.1333
JAAS_C191	jiyu 97	Jilin Province	cultivar	42.4333	45.2667	41.7333	41.2667	18.8667	18.6	19.1333	20.9333
JAAS_C192	jiyu 105	Jilin Province	cultivar	40.4667	41.8333	40.1333	40.9	22.3667	21.7667	21.3333	22.7667
JAAS_C193	jiyu 203	Jilin Province	cultivar	40.5667	41.2667	40.6	39.8667	21.4667	21.6333	21	22.2667
JAAS_C194	jiyu 302	Jilin Province	cultivar	40.6333	41.8667	39.7667	41.9	21.0333	20.9667	20.8667	21.9667
JAAS_C195	jiyu 402	Jilin Province	cultivar	42.4333	43.1667	42.2333	42.4	20.7	20.6333	20.5667	21.6333
JAAS_C196	jiyu 403	Jilin Province	cultivar	39.3667	42.1	40.0667	40.1667	21.3333	21.4	21.3667	22.4667
JAAS_C197	jiyu 406	Jilin Province	cultivar	42	41.3333	41.2333	42.0333	21.1333	21.0333	20.8333	21.7667
JAAS_C198	jiyu 501	Jilin Province	cultivar	42.6	42.6333	40.7333	42.2333	21.1333	20.2333	20.6	21.6667
JAAS_C199	jiyu 504	Jilin Province	cultivar	41.9667	42.9333	41.6333	42.3333	20.6333	20.3	20.1667	21.5333
JAAS_C200	jiyu 505	Jilin Province	cultivar	40.0333	44.4667	41.2	41.7333	21.8667	21.4333	21.1667	22.2667
JAAS_C201	jimidou No.2	Jilin Province	cultivar	42.5667	44.1333	42.4667	42.3667	19.9	19.2667	20.2333	21.2667
JAAS_C202	changnong 25	Jilin Province	cultivar	42	41.2667	37.7667	40.1667	21	21.0333	21.5	22.5
JAAS_C203	changnong 26	Jilin Province	cultivar	41.5667	43.1	42.4333	43.2	21	20.5667	20.2667	21.7
JAAS_C204	jinong 20	Jilin Province	cultivar	42.7	43.1333	40.8333	42.1333	21.0333	20.8333	20.7333	21.4333
JAAS_C205	jinong 24	Jilin Province	cultivar	39.5667	43.4333	40.1333	40.5333	21.5	20.0667	21.1	22.1333
JAAS_C206	jinong 26	Jilin Province	cultivar	41	43.8333	40.2	42.3667	21.3333	20.5	20.3	21.1667
JAAS_C207	oukedou 25	Jilin Province	cultivar	43.1	44.2	39.7	42.3667	20.9333	19.6667	20.6	21.4
JAAS_C208	pingandou 49	Jilin Province	cultivar	41.9333	41.8333	40.3667	39.9667	20.8333	20.7	20.5333	21.7667
JAAS_C209	jifeng No.4	Jilin Province	cultivar	40.1333	41.7333	40.5667	41.3	21.1333	20.3333	20.1333	20.9
JAAS_C210	jidadou No.1	Jilin Province	cultivar	41.1333	43.2	40.8667	41.1667	21.8	21.1	21.0667	22.2
JAAS_C211	yannong 12	Jilin Province	cultivar	41.5333	41.7	39.9	40.3	21.5	21.6333	21.4	22.4333
JAAS_C212	jinyuan 20	Jilin Province	cultivar	42.3	42.8333	42.3333	41.7667	20.6	20.6333	20.5	21.6333
JAAS_C213	fudou 18	Liaoning Province	cultivar	39.2	40.9	37.1	39.5	21.5	21.6667	21.8	22.5333
JAAS_C214	fudou 20	Liaoning Province	cultivar	39.1667	42.7667	40.6333	41.3667	20.9667	21.0333	21.0333	21.5
JAAS_C215	liaodou 24	Liaoning Province	cultivar	41.9667	45.1333	42.2	42.9333	20.7333	20.1333	20.6333	21.0333
JAAS_C216	liaodou 30	Liaoning Province	cultivar	41.2333	43.5	42.2	41.7	21.4	21.5	20.7333	22.2333
JAAS_C217	liaodou 32	Liaoning Province	cultivar	41.1667	42.3	40.3667	41.2	21.7333	21.0333	21.4	21.6333
JAAS_C218	shennong 11	Liaoning Province	cultivar	38.5333	40.8667	39.2	39.9667	21.2	20.8667	21.1	22.1333
JAAS_C219	shennong 12	Liaoning Province	cultivar	42.2	43.9667	42.5333	41.9667	20.6667	20.5667	20.7667	21.4667
JAAS_C220	kuifeng No.1	Liaoning Province	cultivar	41.1667	43.4	41.6	42.4	20.1667	20.5667	19.8333	20.7667
JAAS_C221	tiedou 42	Liaoning Province	cultivar	41.6333	44.3333	43.4667	43.2333	20.7333	20.6	20.1333	21.1333
JAAS_C222	tiedou 43	Liaoning Province	cultivar	40.1	43.6	43.3	43.1667	21.8333	20.1667	20.2	21.1667
JAAS_C223	tiedou 44	Liaoning Province	cultivar	39.8	42.7	40.2333	40.3	21.4667	20.6	21.0333	22.6333
JAAS_C224	tiedou 46	Liaoning Province	cultivar	41.4	44.2	42	42.7667	21.3333	20.6333	20.9333	21.9667
JAAS_C225	tiedou 47	Liaoning Province	cultivar	41.7333	42.5333	42	43.3	21.3333	20.8	20.5667	21.1667
JAAS_C226	tiedou 48	Liaoning Province	cultivar	42.2	43.3333	41.6333	41.4667	20.5667	20	20.5333	21.3667
JAAS_C227	tiedou 53	Liaoning Province	cultivar	41.7	43.3333	42.7333	42.1333	21.0333	21.1667	20.9667	21.6667
JAAS_C228	tiedou 55	Liaoning Province	cultivar	42.6	43	42.4333	43.6333	20.9667	20.5667	20.8333	21.7667
JAAS_C229	mengdou 16	Inner Mongolia	cultivar	42.2	42.5	42.2	42.3333	20.6667	20.4667	20.8	21.4333
JAAS_C230	mengdou 18	Inner Mongolia	cultivar	41.9	43.2333	42.4	41.3333	21.7	21.2	20.7667	22.1667
JAAS_C231	mengdou 24	Inner Mongolia	cultivar	42.2667	42.4	41.3667	41.6333	21.3667	21	21.3333	21.8333
JAAS_C232	mengdou 26	Inner Mongolia	cultivar	41.7333	42.3667	41.6333	39.8	21.5333	21.1	21.4667	22.3
JAAS_C233	mengdou 31	Inner Mongolia	cultivar	41.2	43.1667	40.4667	39.7	21.3667	20.3	21.1	22.3333
JAAS_C234	chi 382	Inner Mongolia	cultivar	42.9333	43.7667	42.0667	42.7667	21.5333	20.3	21.3	22.4667
JAAS_C235	beifeng 14	Heilongjiang Province	cultivar	38.9333	40.9	40.8667	41.1	22.5333	21.4	21.2	22.3333
JAAS_C236	dufeng No.1	Heilongjiang Province	cultivar	40.8667	42.4333	41.9	40.3667	22.0667	21.4667	20.7667	22.3667
JAAS_C237	heihe18	Heilongjiang Province	cultivar	39.9333	40.4	40.4	40.3667	22.3667	22.4667	21.7667	23.4333
JAAS_C238	dongnong 46	Heilongjiang Province	cultivar	41.6667	44.1	43.6333	43.3667	21.3333	20.6333	20.6333	21.7333
JAAS_C239	heinong 48	Heilongjiang Province	cultivar	43.5	45.8333	43.7	44.2667	19.8333	19.4	20.5333	20.6667
JAAS_C240	longpin 03-311	Heilongjiang Province	cultivar	42	43.1333	41.9	43.2	21.3333	20.9333	20.6	21.3333
JAAS_C241	liaoxian No.1	Liaoning Province	cultivar	41.9667	42.3333	41.4667	41.9333	21.3	20.9333	20.8	22.1
JAAS_C242	jiyu 57	Jilin Province	cultivar	39.6333	40.7	39.9667	38.5333	21.1667	20.9333	20.5333	22.5
JAAS_C243	jiyu 94	Jilin Province	cultivar	42.9667	44.1	42.2667	43.1333	21.1	20.4	20.6333	21.5
JAAS_C244	mulanshandengdou	Heilongjiang Province	landrace	40.6333	43.8667	41.1	41.2	21	20.4667	20.2	21.4333
JAAS_C245	liaoyuanjinyuan	Jilin Province	landrace	41.7	45.6667	43.9	44.4667	20.6	20.3	20	20.3667
JAAS_C246	tangyuantujiazi	Heilongjiang Province	landrace	41.3667	43.0333	42.3667	44.6333	21.9333	20.6	21.3667	21.2333
JAAS_C247	fengshoudou	Heilongjiang Province	landrace	41.3333	42.6333	42	43.8	20.8333	20.8	20.7	21.3667
JAAS_C248	doujiaoyehuangdou	Heilongjiang Province	landrace	41.3333	43.1333	44	43.6667	21.6	20.6333	20.0667	21.3333
JAAS_C249	haerbin bendidou	Heilongjiang Province	landrace	42.2333	44.1	42.5667	41.8333	20.9333	20.5333	20.9667	22.1667
JAAS_C250	maoyandou	Liaoning Province	landrace	39.4	44.4	42.5	43.2	21.7	20.1667	20.1333	20.5333
JAAS_C251	tiejiahei	Liaoning Province	landrace	41.8667	44.2667	41.8333	41.8333	21.2667	21.0333	21.4	22.1
JAAS_C252	tongliaohuangjinta	Heilongjiang Province	landrace	42.6	44.6333	43.0667	43.5333	20.8667	20.1667	20.4667	21.2667
JAAS_C253	taiandou	Liaoning Province	landrace	40.6	43.3333	40.9667	42.1667	21.7667	20.9	20.1333	21.8
JAAS_C254	huangtiejia	Liaoning Province	landrace	44.5	49.0667	44.9	46.3667	20.6	18.6333	19.9	19.6333
JAAS_C255	dalihuang	Heilongjiang Province	landrace	42.2	42.0667	41.2	41.6333	21.1667	20.0667	20.6	21.4667
JAAS_C256	dushi No.2	Heilongjiang Province	cultivar	41.6667	45.3333	42.1333	44.2667	21.3	20.0667	20.6	21.2667
JAAS_C257	huangdadou	Liaoning Province	landrace	42.9	45.3333	44.0667	42.4	21.2667	20.7	20.6	21.2667
JAAS_C258	dahuangdou	Liaoning Province	landrace	42.5	47.6667	46.8	45.5333	20.7667	18.8	18.6667	19.7
JAAS_C259	J2512	Jilin Province	cultivar	39.7	42.1333	40.0333	41.7667	21.3	19.9333	20.5	21.4333
JAAS_C260	jidadou No.5	Jilin Province	cultivar	41.0667	41.9333	40.8	41.6	21.2333	20.1	20.3333	22
JAAS_C261	jilidou No.5	Jilin Province	cultivar	40.5667	40.3	41.2	39.8333	21.3667	21.6667	21.1	22.3667
JAAS_C262	changnong29	Jilin Province	cultivar	40.4	41.8	39.9333	40.3667	21.2667	20.9667	21.1	22.3667
JAAS_C263	changmidou 30	Jilin Province	cultivar	42.1	43.1	43.6667	41.1667	19.8667	19.5333	18.7	20.7
JAAS_C264	yanyu No.1	Jilin Province	cultivar	43.7667	44.3	44.1667	43.2333	18.8333	18.9	19.4	19.1333
JAAS_C265	jilinxiaolidou No.7	Jilin Province	cultivar	49.8333	45.3333	45.3	43.1667	18.3	18.6	18.3	20.3667
JAAS_C266	zhongji 605	Jilin Province	cultivar	51.8333	46.4333	54.5333	54.1667	15.8667	18.7	14.1667	14.8333
JAAS_C267	zhongji 603	Jilin Province	cultivar	42.8667	42.1	40.6667	43.7667	21.2	20.9	21.5333	21.1333
JAAS_C268	heihe 43	Heilongjiang Province	cultivar	40.1	41.5333	39.8667	41.1333	21.4	20.7333	20.6667	21.6333
JAAS_C269	jiyu 86	Jilin Province	cultivar	38.5	41.5667	40.9	41.8667	22.7	21	21.3	21.9667
JAAS_C270	heinong No.2	Heilongjiang Province	cultivar	39.4	40.7667	40.3333	39.1	22.1667	21.7	21.2333	22.4667
JAAS_C271	jiyu 202	Jilin Province	cultivar	43.1333	44.7333	43.8333	43.4	20.5	20.1	20.1667	21.5
JAAS_C272	dongnong 42	Heilongjiang Province	cultivar	41.6667	43.6667	41.5	42.0667	20.6	20.3	20.3667	21.7667
JAAS_C273	jiqing No.3	Jilin Province	cultivar	39.4	42.2667	39.9333	41.1667	21.7333	22.1	21.4333	22.3333
JAAS_C274	zhongji 602	Jilin Province	cultivar	39.1333	41.2333	40.4	39.2	21.4	21.3333	21.2667	23.0667
JAAS_C275	jiyu 401	Jilin Province	cultivar	41.5667	41.8333	40.8667	39.9667	20.5667	19.7333	20.4333	21.7
JAAS_C276	jiyu 266	Jilin Province	cultivar	41.8667	42.3333	41.3	40.1667	21.7	21.0667	20.9	22.1667
JAAS_C277	suinong 28	Heilongjiang Province	cultivar	44.3333	45.1	43.4	43.3	20.8667	20.4333	21.0333	21.3333
JAAS_C278	jiyu 257	Jilin Province	cultivar	40.7	43.2	41.7	41.9333	21.4	21.1333	21.5333	22.1667
JAAS_C279	jiyu 259	Jilin Province	cultivar	41.1	43.1333	42.3667	42.1333	22.0667	20.9333	21.1667	22.4667
JAAS_C280	jiyu 299	Jilin Province	cultivar	41.5333	44.1667	41.9667	42.3333	21	20.5667	20.9	21.2667
JAAS_C281	jiyu 303	Jilin Province	cultivar	39.4	43.0333	41.1333	40.6333	21.6333	20.7667	20.8	22.3333
JAAS_C282	jiyu 441	Jilin Province	cultivar	41.3667	42.6333	41.0667	41.4667	21.2667	20.4	21.3	21.9
JAAS_C283	heihe 38	Heilongjiang Province	cultivar	38.4667	42.1333	40.8333	40.1	21.7	20.8667	20.9667	22.3667
JAAS_C284	junnong 68	Jilin Province	cultivar	40.9667	43.9667	41.0667	41.9667	20.0667	19.1	19.6	21.1333
JAAS_C285	jiyu 101	Jilin Province	cultivar	39.1333	44.7	40.5	38.6667	22.2333	20.6667	21.5333	23.1333
JAAS_C286	jiyu 481	Jilin Province	cultivar	41.9667	44.9667	40.7333	40.6667	21.0667	19.4333	20.9	21.8333
JAAS_C287	changnong 14	Jilin Province	cultivar	39.4667	40.0667	38.6667	37.8333	21.7333	21.3667	21.2667	23.2333
JAAS_C288	changnong 19	Jilin Province	cultivar	38.9667	40.6	38.4667	38.1333	22.0667	21.2667	21.7	23.4
JAAS_C289	changnong 21	Jilin Province	cultivar	39.5667	40.5667	38.1333	39	21.5333	21.0333	21.6	23.0667
JAAS_C290	changnong 27	Jilin Province	cultivar	41.1667	42.2	40.8	40.9	21.9	21.5	21.5667	22.5333
JAAS_C291	suinong 26	Heilongjiang Province	cultivar	41	41.5333	41.8667	41.4333	21.8667	21.3333	21.7667	22.5667
JAAS_C292	heinong 31	Heilongjiang Province	cultivar	41.8333	44.0333	42.4667	42.9333	21.0333	20.7	20.6333	21.4667
JAAS_C293	gong P06-6	Jilin Province	cultivar	42.9667	44.5	41.9667	42.5667	20.6667	20.6667	21.1	21.1667
JAAS_C294	gong P06-12	Jilin Province	cultivar	41.6333	43.6	42.5667	41.6	21.7	20.7	20.9	21.6667
JAAS_C295	gong P06-13	Jilin Province	cultivar	41.4333	44.6333	41.8333	43.1	22.0333	20.7333	21.3333	21.3
JAAS_C296	gong P06-34	Jilin Province	cultivar	39.3	40.7333	40.2333	39.8333	22.2	21.5333	21.9	22.6
JAAS_C297	gong P06-19	Jilin Province	cultivar	45.8333	49.3	45.1667	44.8667	18.2667	17.1667	19.3667	20.1333
JAAS_C298	tongnong 15	Jilin Province	cultivar	40.8333	42.9333	39.3667	39.9333	21.1667	20.4	21	22.5333
JAAS_C299	tongnong 943	Jilin Province	cultivar	41.5333	40.9667	38.5333	40.0333	21.8333	21.6667	22.4667	23.2333
JAAS_C300	jiyu 507	Jilin Province	cultivar	42.3333	43.6333	41.2333	41.5333	20.6667	20.0333	20.2333	22.0667
JAAS_C301	Williams 82	United States of America	cultivar	40.7667	41.3333	41.8	42.4333	21.6	20.1667	21.6333	21.6333
JAAS_C302	hefeng 37	Heilongjiang Province	cultivar	41.5667	42.8	41.1333	40.9667	21.3333	20.6333	21.8333	22.2333
JAAS_C303	heinong 37	Heilongjiang Province	cultivar	43.2667	44.4333	44	43.5	20.5667	20.2	20.9	21
JAAS_C304	dongnong 56	Heilongjiang Province	cultivar	41.3	41.8	40.4667	42.4333	22.1667	21.3667	22.1667	21.8667
JAAS_C305	dongnong 59	Heilongjiang Province	cultivar	44.2667	45.1	42.9333	44	20.6333	20.5667	21.2	21
JAAS_C306	suinong 52	Heilongjiang Province	cultivar	44.3333	44.9	43.5	44.1	20.3333	20.5667	21.5	21.0333
JAAS_C307	sui wuxingdou No.2	Heilongjiang Province	cultivar	41.8667	42.2	40.6667	40.7	21.5667	21.1333	22.0667	22.7333
JAAS_C308	heinong 69	Heilongjiang Province	cultivar	39.6667	42.9667	41.0667	41.1333	22.8	21.9667	21.9667	21.9
JAAS_C309	kangxianchong No.6	Heilongjiang Province	cultivar	42.7667	44.8333	42.4	43.7	19.2667	19.3667	19.5667	19.6667
JAAS_C310	jilinxiaoli No.8	Jilin Province	cultivar	40.8667	43.7667	42.7667	42.7333	20.5	20.6333	21.0333	21.0667
JAAS_C311	jinong 32	Jilin Province	cultivar	38.3667	40.3667	38.7667	40.1	21.1	20.6333	20.8	21.3333
JAAS_C312	jiunong 36	Jilin Province	cultivar	39.2	40.7667	41.2	41.6	22.6667	22.3	21.8	22.0667
JAAS_C313	kangxianchong 11	Heilongjiang Province	cultivar	41.3667	41.4	40.7667	39.3	21.0667	20.9	21.2333	22.8333
JAAS_C314	jinong 29	Jilin Province	cultivar	40.6	43.4333	41.1333	41.2	21.2333	21.4333	21.5333	22
JAAS_C315	huali No.1	Jilin Province	cultivar	41.4	42.2667	41.7	41.8333	21.1	20.4667	20.5	21.6
JAAS_C316	jinong 16	Jilin Province	cultivar	41.3	41.7667	39.7	39.8	21.7667	21.2333	22.2333	22.9667
JAAS_C317	jiyu 58	Jilin Province	cultivar	41.2333	42.8	40.8	41.6	20.8	20.1333	19.9667	21.2333
JAAS_C318	jiyu 69	Jilin Province	cultivar	38.8333	41.3	40.6	40.0333	21.6667	21.5	21.4333	22.2
JAAS_C319	jiyu 508	Jilin Province	cultivar	42.6333	46.2667	43.5667	45.7667	19.7333	19.2	19.2667	20
JAAS_C320	jilin xiaolidou	Jilin Province	cultivar	41.9	41.3667	41.7667	43.7667	20.4333	20.3	20.7333	21.1667
JAAS_C321	jiyu 47	Jilin Province	cultivar	40.8	42.4667	41.3333	41.3667	21.1667	20.3333	21.2333	21.9
JAAS_C322	jiyu 72	Jilin Province	cultivar	39.6	42.3333	39.7	40.3333	21.1	20.1	21.6	22.0333
JAAS_C323	jilin 35	Jilin Province	cultivar	40.3333	38.9667	39.1667	39	21.5333	21.2	21.7333	22.6667
JAAS_C324	qingpi (2)	Liaoning Province	landrace	45.4	43.7	43.9333	44.9667	19.4667	19.4667	19.7	19.9
JAAS_C325	qingpi (3)	Liaoning Province	landrace	43.7667	45.6333	43.1	44.7	18.9333	18.4667	19	18.8667
JAAS_C326	jilin 36	Jilin Province	cultivar	40.3667	40.9333	39.8667	40.9333	20.9	20.9667	21.0667	21.6
JAAS_C327	jilin No.3	Jilin Province	cultivar	39.7333	42.9667	43.5667	42.2333	20.9	19.1	18.8	20.2
JAAS_C328	mengdou 12	Inner Mongolia	cultivar	41.0333	42.0667	42.1667	42.2667	21.9	21.0667	22.1333	22.5
JAAS_C329	jiyu 67	Jilin Province	cultivar	39.1667	42.1333	40.9333	40.6667	22.3333	21.6	22.1	22.7
JAAS_C330	jiyu 101	Jilin Province	cultivar	39.7	43.4333	42.0333	41.5	20.3	19.9667	19.4333	20.4333
JAAS_C331	suinong No.6	Heilongjiang Province	cultivar	41.6333	41.1667	41.0333	43.1333	21.0667	21.2667	21.8	21.7667
JAAS_C332	ke 4430-20	Heilongjiang Province	cultivar	43.2667	46.1667	44.5667	43.3667	21.1667	19.1333	20.7	21.4333
JAAS_C333	dongnong No.4	Heilongjiang Province	cultivar	40.3	42.7	43.2	41.0667	22.3667	20.9667	20.7333	22.6
JAAS_C334	dongnong 690	Heilongjiang Province	cultivar	44.8333	47.1	47.5667	47.4	19.4667	17.2333	18.8667	18.7333

## Sheet: Table S2
Table S2 Informations of SNPs in 20 chromosomes
Chromosome	SNP number	Chromosome lenth (bp)	bp/SNP
Chr.01	146343	56831511	388.345
Chr.02	136875	48570528	354.853
Chr.03	186439	45779612	245.547
Chr.04	216148	52388438	242.373
Chr.05	88463	42233705	477.417
Chr.06	188313	51414953	273.029
Chr.07	128402	44630336	347.583
Chr.08	127813	47837362	374.276
Chr.09	205439	50188514	244.299
Chr.10	162160	51566590	317.998
Chr.11	60583	34765068	573.842
Chr.12	89945	40090275	445.72
Chr.13	150964	45872874	303.866
Chr.14	139376	49041760	351.867
Chr.15	259848	51756229	199.179
Chr.16	174927	37886528	216.585
Chr.17	173914	41639745	239.427
Chr.18	294465	58017852	197.028
Chr.19	227013	50741324	223.517
Chr.20	149283	47903874	320.893
All	3306713	949157078	287.039

## Sheet: Table S3
Table S3 Informations of InDels in 20 chromosomes
Chromosome	InDel number	Chromosome lenth (bp)	bp/InDel
Chr.01	9029	51920681	5750.44
Chr.02	11307	48571027	4295.66
Chr.03	14834	45778182	3086.03
Chr.04	14190	52385266	3691.7
Chr.05	8569	42233373	4928.62
Chr.06	14304	51415068	3594.45
Chr.07	10951	44629485	4075.38
Chr.08	10924	47837115	4379.08
Chr.09	16051	50184810	3126.58
Chr.10	11388	51555364	4527.17
Chr.11	5642	34764957	6161.81
Chr.12	7510	40088474	5338.01
Chr.13	13547	45870661	3386.04
Chr.14	10744	49035229	4563.96
Chr.15	17910	51754628	2889.71
Chr.16	14034	37878055	2699.02
Chr.17	12057	41636643	3453.32
Chr.18	20828	58012131	2785.3
Chr.19	15040	50743869	3373.93
Chr.20	11039	47903715	4339.5
All	249898	944198733	3778.34

## Sheet: Table S4
Table S4 Significant SNPs associated with seed oil and protein contents
Year	SNP maker	Chromosome	Position	Ref	Alt	P.value	Trait
2020	SGM01_245857	Chr.01	245857	G	C	1.2939e-07	Protein
2022	SGM02_15300872	Chr.02	15300872	C	T	8.31138e-08	Oil
2022	SGM02_15301502	Chr.02	15301502	C	T	4.29935e-09	Oil
2020	SGM02_15762367	Chr.02	15762367	A	G	4.94021e-08	Oil
2021	SGM02_28538266	Chr.02	28538266	T	G	2.3485e-07	Oil
2020	SGM02_38061559	Chr.02	38061559	A	C	3.07229e-08	Oil
2020	SGM02_38170472	Chr.02	38170472	T	C	1.86031e-07	Oil
2020	SGM02_38197812	Chr.02	38197812	T	C	1.01625e-07	Oil
2020	SGM02_38450675	Chr.02	38450675	T	C	1.66819e-07	Oil
2020	SGM02_38665184	Chr.02	38665184	T	C	9.24775e-08	Oil
2023	SGM04_1642396	Chr.04	1642396	G	A	3e-07	Oil
2022	SGM04_6939304	Chr.04	6939304	T	C	1.21997e-07	Oil
2023	SGM04_6945324	Chr.04	6945324	A	C	3.48e-08	Oil
2022	SGM04_17952612	Chr.04	17952612	C	T	9.17378e-08	Protein
2020	SGM04_17969003	Chr.04	17969003	T	A	1.04341e-07	Protein
2022	SGM04_17997676	Chr.04	17997676	C	T	2.14543e-07	Protein
2022	SGM04_18003405	Chr.04	18003405	C	T	3.24149e-08	Protein
2022	SGM04_18053512	Chr.04	18053512	G	A	1.74919e-07	Protein
2022	SGM04_18053625	Chr.04	18053625	G	A	1.25972e-07	Protein
2020	SGM04_18053656	Chr.04	18053656	G	C	1.04245e-07	Protein
2022	SGM04_18074069	Chr.04	18074069	C	A	2.83369e-07	Protein
2020	SGM05_36568169	Chr.05	36568169	C	G	1.98423e-07	Oil
2020	SGM05_36571289	Chr.05	36571289	C	A	7.38829e-08	Oil
2021	SGM05_36571289	Chr.05	36571289	C	A	2.9733e-07	Oil
2020	SGM05_36572301	Chr.05	36572301	C	T	5.3976e-08	Oil
2020	SGM05_36572305	Chr.05	36572305	G	C	5.3976e-08	Oil
2020	SGM05_36572974	Chr.05	36572974	T	C	1.89806e-07	Oil
2020	SGM05_36574164	Chr.05	36574164	A	G	3.16875e-08	Oil
2021	SGM05_36574164	Chr.05	36574164	A	G	9.01521e-10	Oil
2020	SGM05_36575160	Chr.05	36575160	C	T	2.53664e-07	Oil
2020	SGM05_36578229	Chr.05	36578229	A	G	1.32182e-07	Oil
2020	SGM05_36579277	Chr.05	36579277	A	T	1.18864e-07	Oil
2020	SGM05_36579790	Chr.05	36579790	T	A	2.42691e-07	Oil
2020	SGM05_36580464	Chr.05	36580464	A	C	2.0753e-07	Oil
2020	SGM05_36581160	Chr.05	36581160	T	C	1.00464e-07	Oil
2021	SGM05_36581160	Chr.05	36581160	T	C	1.36205e-09	Oil
2023	SGM05_36581160	Chr.05	36581160	T	C	2.41e-08	Oil
2022	SGM08_14795150	Chr.08	14795150	A	T	2.10661e-07	Oil
2020	SGM08_14982296	Chr.08	14982296	T	A	2.95621e-07	Protein
2022	SGM08_15054331	Chr.08	15054331	T	C	2.68486e-07	Oil
2023	SGM08_15500511	Chr.08	15500511	T	A	5.26e-09	Oil
2023	SGM08_15500511	Chr.08	15500511	T	A	4.18e-08	Protein
2023	SGM08_15500657	Chr.08	15500657	C	G	2.46e-07	Oil
2023	SGM08_15500991	Chr.08	15500991	A	T	2.14e-08	Oil
2022	SGM08_39997190	Chr.08	39997190	G	A	2.7232e-07	Protein
2022	SGM08_40332972	Chr.08	40332972	A	G	7.28581e-08	Protein
2020	SGM09_29867651	Chr.09	29867651	C	T	2.25125e-08	Oil
2020	SGM09_29867659	Chr.09	29867659	A	G	7.38281e-08	Oil
2020	SGM09_41696280	Chr.09	41696280	C	T	4.59465e-08	Oil
2020	SGM12_4307346	Chr.12	4307346	T	A	7.72483e-08	Oil
2020	SGM12_36116413	Chr.12	36116413	T	C	6.3397e-08	Oil
2020	SGM12_36117124	Chr.12	36117124	A	G	1.33071e-09	Oil
2020	SGM12_36117237	Chr.12	36117237	C	G	2.17161e-07	Oil
2021	SGM15_2474523	Chr.15	2474523	G	T	1.16363e-07	Protein
2020	SGM15_3867007	Chr.15	3867007	G	A	1.83428e-07	Protein
2020	SGM15_3868834	Chr.15	3868834	A	C	2.39864e-07	Protein
2022	SGM17_2526787	Chr.17	2526787	C	T	1.29855e-07	Oil
2022	SGM17_2584339	Chr.17	2584339	A	C	7.10769e-08	Oil
2021	SGM17_2739529	Chr.17	2739529	A	T	1.63254e-07	Oil
2020	SGM17_8155012	Chr.17	8155012	C	T	3.88973e-08	Oil
2020	SGM17_8155846	Chr.17	8155846	A	G	2.48106e-08	Oil
2020	SGM17_8249684	Chr.17	8249684	T	C	3.47878e-08	Oil
2020	SGM17_8263485	Chr.17	8263485	C	T	4.89079e-08	Oil
2020	SGM18_48629310	Chr.18	48629310	A	C	1.6439e-07	Oil
2020	SGM18_48724861	Chr.18	48724861	A	C	9.76908e-08	Oil
2020	SGM18_53161380	Chr.18	53161380	G	C	8.38459e-08	Oil
2023	SGM18_56410056	Chr.18	56410056	A	G	1.45e-07	Protein
2023	SGM18_56410114	Chr.18	56410114	T	A	6.66e-08	Protein
2023	SGM18_56410705	Chr.18	56410705	A	C	2.54e-07	Protein
2023	SGM18_56412323	Chr.18	56412323	A	G	1.62e-07	Oil
2023	SGM18_56413255	Chr.18	56413255	T	G	1.56e-07	Protein
2022	SGM18_56413352	Chr.18	56413352	C	A	1.47041e-07	Oil
2022	SGM18_56413519	Chr.18	56413519	A	G	1.7448e-07	Oil
2023	SGM18_56413636	Chr.18	56413636	T	G	1.64e-07	Protein
2022	SGM18_56414771	Chr.18	56414771	T	C	1.32304e-07	Oil
2022	SGM18_56414949	Chr.18	56414949	T	C	2.56143e-09	Oil
2023	SGM18_56414949	Chr.18	56414949	T	C	1.67e-08	Oil
2022	SGM18_56415658	Chr.18	56415658	T	C	1.96525e-07	Oil
2022	SGM18_56441215	Chr.18	56441215	A	G	1.77144e-08	Oil
2022	SGM18_56903123	Chr.18	56903123	G	T	8.47079e-08	Oil
2022	SGM18_56903170	Chr.18	56903170	A	G	5.40478e-08	Oil
2022	SGM18_56904950	Chr.18	56904950	C	T	5.84972e-08	Oil
2022	SGM18_56905204	Chr.18	56905204	G	A	4.39728e-08	Oil
2020	SGM18_57241943	Chr.18	57241943	A	G	1.94459e-07	Oil
2022	SGM18_57241943	Chr.18	57241943	A	G	3.20431e-08	Oil
2020	SGM18_57242007	Chr.18	57242007	T	C	6.07257e-08	Oil
2022	SGM18_57242007	Chr.18	57242007	T	C	3.68346e-09	Oil
2020	SGM18_57242685	Chr.18	57242685	A	T	9.77044e-08	Oil
2022	SGM18_57242685	Chr.18	57242685	A	T	2.28316e-08	Oil
2022	SGM18_57242776	Chr.18	57242776	C	T	4.72943e-08	Oil
2020	SGM18_57242802	Chr.18	57242802	C	G	2.8782e-07	Oil
2022	SGM18_57242802	Chr.18	57242802	C	G	4.61428e-08	Oil
2020	SGM18_57243027	Chr.18	57243027	A	C	2.10969e-07	Oil
2022	SGM18_57243027	Chr.18	57243027	A	C	5.14188e-08	Oil
2022	SGM18_57312429	Chr.18	57312429	T	A	8.91234e-08	Oil
2021	SGM19_4786246	Chr.19	4786246	T	G	1.31731e-07	Oil
2021	SGM20_150162	Chr.20	150162	C	G	6.67487e-08	Oil
2020	SGM20_232139	Chr.20	232139	T	A	2.87595e-07	Oil
2023	SGM20_232139	Chr.20	232139	T	A	7.61e-09	Oil
2020	SGM20_232139	Chr.20	232139	T	A	2.22293e-08	Protein
2020	SGM20_420592	Chr.20	420592	T	C	1.51488e-08	Oil
2021	SGM20_895442	Chr.20	895442	G	A	1.78847e-08	Oil
2021	SGM20_896656	Chr.20	896656	A	G	2.87581e-07	Oil
2021	SGM20_896747	Chr.20	896747	T	G	2.22602e-07	Oil
2021	SGM20_897062	Chr.20	897062	C	T	3.43471e-08	Oil
2022	SGM20_897062	Chr.20	897062	C	T	2.44525e-08	Oil
2021	SGM20_897339	Chr.20	897339	C	T	1.43689e-07	Oil
2021	SGM20_897456	Chr.20	897456	T	C	3.0451e-08	Oil
2021	SGM20_897474	Chr.20	897474	A	G	3.11731e-08	Oil
2021	SGM20_897478	Chr.20	897478	C	G	3.0451e-08	Oil
2021	SGM20_899140	Chr.20	899140	A	G	6.00908e-08	Oil
2021	SGM20_900603	Chr.20	900603	T	G	3.89217e-08	Oil
2021	SGM20_917442	Chr.20	917442	A	G	2.15643e-07	Oil
2021	SGM20_917852	Chr.20	917852	T	C	2.76777e-07	Oil
2021	SGM20_918220	Chr.20	918220	T	C	1.84567e-07	Oil
2021	SGM20_918262	Chr.20	918262	G	A	1.349e-08	Oil
2021	SGM20_918290	Chr.20	918290	G	A	2.56021e-08	Oil
2021	SGM20_918874	Chr.20	918874	C	A	3.49977e-08	Oil
2021	SGM20_921968	Chr.20	921968	T	C	2.06739e-07	Oil
2020	SGM20_5707896	Chr.20	5707896	C	T	3.74614e-08	Oil
2020	SGM20_5707896	Chr.20	5707896	C	T	5.099e-08	Protein
2023	SGM20_10351245	Chr.20	10351245	A	G	1.88e-07	Oil
2020	SGM20_11041871	Chr.20	11041871	T	C	2.69954e-07	Oil
2020	SGM20_11041871	Chr.20	11041871	T	C	3.81175e-08	Protein
2020	SGM20_11285637	Chr.20	11285637	C	A	1.14436e-07	Protein
2023	SGM20_12113211	Chr.20	12113211	C	T	2.8e-07	Oil
2020	SGM20_12250174	Chr.20	12250174	T	C	2.9811e-07	Protein
2020	SGM20_14713864	Chr.20	14713864	A	C	8.49311e-08	Oil
2022	SGM20_14713864	Chr.20	14713864	A	C	6.95335e-09	Oil
2020	SGM20_14713864	Chr.20	14713864	A	C	1.13714e-08	Protein
2020	SGM20_18367950	Chr.20	18367950	T	C	1.99736e-07	Protein
2020	SGM20_25308629	Chr.20	25308629	A	G	1.4205e-07	Oil

## Sheet: Table S5
Table S5 Significant InDels associated with seed oil and protein contents
Year	InDel maker	Chromosome	Position	Ref	Alt	P.value	Trait
2021	SGM01_7571404	Chr.01	7571404	TA	T	1.44358e-07	Oil
2022	SGM02_15415456	Chr.02	15415456	T	TATAAG	1.33557e-06	Oil
2022	SGM02_15422528	Chr.02	15422528	T	TG	2.33781e-06	Oil
2022	SGM02_15422530	Chr.02	15422530	A	AG	2.33781e-06	Oil
2023	SGM02_15781359	Chr.02	15781359	T	TTC	2.2063e-06	Oil
2023	SGM02_17127736	Chr.02	17127736	C	CT	1.38616e-06	Oil
2020	SGM02_41981809	Chr.02	41981809	A	AAAAAAC	1.38797e-06	Protein
2023	SGM02_41992754	Chr.02	41992754	A	AAAG	1.33043e-06	Oil
2022	SGM02_42396953	Chr.02	42396953	T	TTA	3.97583e-06	Protein
2020	SGM03_3986531	Chr.03	3986531	AT	A	9.40252e-07	Oil
2022	SGM03_3986531	Chr.03	3986531	AT	A	1.52071e-06	Oil
2020	SGM04_1474055	Chr.04	1474055	A	AT	3.50123e-06	Protein
2020	SGM04_1642928	Chr.04	1642928	T	TA	3.91482e-06	Oil
2020	SGM04_2178115	Chr.04	2178115	TAGTGA	T	9.46582e-07	Oil
2022	SGM04_2178115	Chr.04	2178115	TAGTGA	T	1.67378e-06	Oil
2023	SGM04_5023240	Chr.04	5023240	A	AATATGTC	1.20118e-09	Oil
2023	SGM04_5023240	Chr.04	5023240	A	AATATGTC	3.84372e-06	Protein
2023	SGM04_5116404	Chr.04	5116404	T	TTA	5.6713e-07	Oil
2022	SGM04_8102921	Chr.04	8102921	T	TA	2.1082e-06	Oil
2023	SGM04_8102921	Chr.04	8102921	T	TA	2.59007e-06	Oil
2023	SGM04_12629598	Chr.04	12629598	GT	G	5.72357e-07	Protein
2023	SGM04_22707319	Chr.04	22707319	A	AGTCAAAGAG	3.0507e-06	Oil
2022	SGM04_40568662	Chr.04	40568662	T	TA	1.85181e-06	Protein
2023	SGM04_40568662	Chr.04	40568662	T	TA	4.68794e-07	Protein
2022	SGM04_41067545	Chr.04	41067545	G	GA	2.13918e-06	Oil
2020	SGM04_41067545	Chr.04	41067545	G	GA	3.61424e-06	Protein
2022	SGM04_41807302	Chr.04	41807302	C	CT	1.42599e-07	Protein
2022	SGM04_42464016	Chr.04	42464016	C	CA	7.38046e-07	Oil
2020	SGM05_1905249	Chr.05	1905249	T	TAAC	1.16518e-06	Protein
2020	SGM05_1909647	Chr.05	1909647	A	AAGAATAAC	7.26823e-07	Oil
2020	SGM05_1909647	Chr.05	1909647	A	AAGAATAAC	2.13477e-07	Protein
2022	SGM05_33328853	Chr.05	33328853	ATTTG	A	7.27689e-07	Oil
2020	SGM05_36574450	Chr.05	36574450	T	TC	2.07426e-06	Oil
2021	SGM05_36574450	Chr.05	36574450	T	TC	2.42933e-06	Oil
2023	SGM06_20536673	Chr.06	20536673	C	CA	2.13782e-06	Oil
2020	SGM08_15033458	Chr.08	15033458	G	GA	1.82216e-06	Protein
2023	SGM08_15502732	Chr.08	15502732	C	CCGG	3.93044e-07	Oil
2020	SGM08_15502732	Chr.08	15502732	C	CCGG	2.97766e-06	Protein
2023	SGM08_15502732	Chr.08	15502732	C	CCGG	1.6881e-06	Protein
2022	SGM08_39996548	Chr.08	39996548	T	TC	4.27996e-07	Protein
2022	SGM08_40104071	Chr.08	40104071	A	AAC	2.66527e-06	Protein
2023	SGM08_40104071	Chr.08	40104071	A	AAC	1.08787e-07	Protein
2022	SGM08_42851995	Chr.08	42851995	G	GCCTGTT	1.23308e-06	Oil
2022	SGM09_24757191	Chr.09	24757191	T	TA	4.06988e-07	Oil
2020	SGM09_29569500	Chr.09	29569500	T	TAGAA	2.54061e-06	Oil
2022	SGM09_30220278	Chr.09	30220278	T	TAG	1.89531e-06	Oil
2020	SGM09_37856582	Chr.09	37856582	T	TG	2.87894e-06	Oil
2020	SGM09_37946598	Chr.09	37946598	A	AC	1.92306e-06	Protein
2023	SGM10_9546007	Chr.10	9546007	G	GT	1.50255e-06	Oil
2023	SGM10_9610782	Chr.10	9610782	T	TTG	2.61614e-06	Oil
2023	SGM10_34363963	Chr.10	34363963	AAAACAAACAAGAAAAAGAAAT	A	8.15126e-07	Oil
2023	SGM12_35426482	Chr.12	35426482	AT	A	2.06309e-07	Oil
2023	SGM13_1064422	Chr.13	1064422	AT	A	4.35476e-07	Oil
2023	SGM16_7270988	Chr.16	7270988	AT	A	2.11405e-07	Oil
2023	SGM17_3118594	Chr.17	3118594	T	TTACATTTTATTCTG	1.00531e-06	Oil
2020	SGM17_8237234	Chr.17	8237234	C	CT	6.75413e-07	Oil
2020	SGM17_8335202	Chr.17	8335202	T	TA	2.04438e-07	Oil
2022	SGM17_8335202	Chr.17	8335202	T	TA	2.15419e-06	Oil
2020	SGM17_8335202	Chr.17	8335202	T	TA	2.54984e-07	Protein
2020	SGM17_8406050	Chr.17	8406050	A	AAAC	1.5091e-08	Oil
2020	SGM17_8412768	Chr.17	8412768	G	GTC	1.23798e-06	Oil
2020	SGM17_8462234	Chr.17	8462234	T	TC	1.14289e-08	Oil
2022	SGM17_8462234	Chr.17	8462234	T	TC	2.88978e-06	Oil
2020	SGM17_8504019	Chr.17	8504019	G	GA	8.72236e-07	Oil
2020	SGM17_8560518	Chr.17	8560518	T	TA	9.47937e-07	Oil
2020	SGM17_8993424	Chr.17	8993424	A	AT	3.40592e-06	Oil
2020	SGM17_9475289	Chr.17	9475289	T	TTTC	3.1583e-06	Protein
2020	SGM17_11919205	Chr.17	11919205	G	GAT	2.56133e-08	Protein
2020	SGM18_48599328	Chr.18	48599328	A	AGATG	5.67206e-08	Oil
2022	SGM18_48599328	Chr.18	48599328	A	AGATG	7.45695e-08	Oil
2020	SGM18_48599539	Chr.18	48599539	T	TTA	2.61703e-06	Oil
2020	SGM18_48604085	Chr.18	48604085	A	ACCTT	3.33859e-06	Oil
2020	SGM18_48724116	Chr.18	48724116	AT	A	1.36271e-07	Oil
2022	SGM18_56410929	Chr.18	56410929	C	CCTTCTTCAGTT	3.49311e-07	Oil
2023	SGM18_56410929	Chr.18	56410929	C	CCTTCTTCAGTT	1.55966e-07	Oil
2022	SGM18_56452443	Chr.18	56452443	T	TGTCAGAGAGACAGAG	1.79949e-06	Protein
2022	SGM18_56902360	Chr.18	56902360	T	TC	9.40922e-07	Oil
2020	SGM19_195301	Chr.19	195301	AT	A	2.51275e-07	Oil
2021	SGM19_36398770	Chr.19	36398770	A	AG	7.40226e-07	Oil
2023	SGM20_561785	Chr.20	561785	A	ATTTGT	3.4557e-07	Oil
2022	SGM20_561785	Chr.20	561785	A	ATTTGT	3.43181e-07	Protein
2023	SGM20_561785	Chr.20	561785	A	ATTTGT	7.86523e-07	Protein
2020	SGM20_2670206	Chr.20	2670206	T	TC	1.3365e-06	Protein
2022	SGM20_2670206	Chr.20	2670206	T	TC	3.92837e-06	Protein
2023	SGM20_2964973	Chr.20	2964973	C	CA	3.71743e-06	Oil
2023	SGM20_3805149	Chr.20	3805149	G	GCAATA	3.50942e-07	Oil
2023	SGM20_4648777	Chr.20	4648777	A	AGATGAGCAATTCT	5.44751e-09	Oil
2023	SGM20_12176437	Chr.20	12176437	T	TG	1.87968e-06	Oil
2022	SGM20_12558243	Chr.20	12558243	G	GT	3.40967e-06	Protein
2023	SGM20_12558243	Chr.20	12558243	G	GT	1.24496e-06	Protein
2020	SGM20_16829930	Chr.20	16829930	T	TA	2.89276e-07	Oil
2023	SGM20_16829930	Chr.20	16829930	T	TA	1.49523e-07	Oil
2020	SGM20_16829930	Chr.20	16829930	T	TA	1.37493e-07	Protein
2023	SGM20_16829930	Chr.20	16829930	T	TA	3.4745e-07	Protein
2023	SGM20_18159139	Chr.20	18159139	GATA	G	1.9266e-06	Oil
2023	SGM20_18819059	Chr.20	18819059	C	CA	2.75057e-06	Oil
2023	SGM20_18819059	Chr.20	18819059	C	CA	6.24274e-07	Protein
2022	SGM20_19161313	Chr.20	19161313	A	ATGTATTGACATGTG	3.78778e-06	Protein
2020	SGM20_19166406	Chr.20	19166406	G	GTC	2.35867e-06	Protein
2022	SGM20_19166406	Chr.20	19166406	G	GTC	4.36307e-07	Protein
2020	SGM20_19369484	Chr.20	19369484	A	ATCTCT	2.36088e-06	Protein
2022	SGM20_19421831	Chr.20	19421831	C	CAA	3.85954e-06	Oil
2023	SGM20_19421831	Chr.20	19421831	C	CAA	5.93158e-08	Oil
2020	SGM20_19421831	Chr.20	19421831	C	CAA	3.14776e-07	Protein
2022	SGM20_19421831	Chr.20	19421831	C	CAA	3.65233e-07	Protein
2023	SGM20_19421831	Chr.20	19421831	C	CAA	1.70432e-07	Protein
2022	SGM20_19450987	Chr.20	19450987	T	TCTAGGGATCC	2.60013e-06	Protein
2020	SGM20_19470626	Chr.20	19470626	A	AT	1.79573e-07	Protein
2023	SGM20_19470626	Chr.20	19470626	A	AT	3.75617e-06	Protein
2022	SGM20_19490949	Chr.20	19490949	A	AT	1.69329e-06	Protein
2022	SGM20_19574002	Chr.20	19574002	G	GAAC	1.01074e-06	Protein
2020	SGM20_19578721	Chr.20	19578721	T	TGCTA	1.52181e-06	Protein
2022	SGM20_19592510	Chr.20	19592510	T	TC	3.20199e-06	Protein
2022	SGM20_19604645	Chr.20	19604645	T	TA	3.36923e-06	Protein
2022	SGM20_20174479	Chr.20	20174479	C	CAT	3.55636e-06	Protein
2023	SGM20_20174479	Chr.20	20174479	C	CAT	2.00686e-06	Protein
2022	SGM20_20536378	Chr.20	20536378	A	AT	8.55773e-07	Protein
2022	SGM20_21611611	Chr.20	21611611	C	CT	1.69409e-06	Protein
2022	SGM20_23029748	Chr.20	23029748	C	CT	1.58352e-06	Protein
2022	SGM20_23270284	Chr.20	23270284	T	TTTC	3.94942e-06	Protein
2022	SGM20_23324034	Chr.20	23324034	T	TG	1.24739e-06	Protein
2023	SGM20_23324034	Chr.20	23324034	T	TG	6.42742e-07	Protein
2022	SGM20_23535912	Chr.20	23535912	G	GAAGGA	2.60013e-06	Protein
2020	SGM20_23560788	Chr.20	23560788	CA	C	1.60046e-06	Protein
2022	SGM20_23585412	Chr.20	23585412	A	AT	2.60013e-06	Protein
2022	SGM20_23885286	Chr.20	23885286	A	AT	1.40547e-06	Protein
2020	SGM20_24473918	Chr.20	24473918	T	TAC	1.47666e-08	Protein
2022	SGM20_24585943	Chr.20	24585943	G	GGAA	1.79091e-06	Protein
2023	SGM20_24585943	Chr.20	24585943	G	GGAA	4.71486e-07	Protein
2022	SGM20_24804769	Chr.20	24804769	A	ACTT	3.94807e-06	Protein
2021	SGM20_30117807	Chr.20	30117807	C	CTCTTG	3.70832e-06	Protein
2020	SGM20_43687148	Chr.20	43687148	A	AT	3.89825e-07	Oil
2022	SGM20_43687148	Chr.20	43687148	A	AT	5.73953e-07	Oil
2020	SGM20_43687148	Chr.20	43687148	A	AT	1.58188e-06	Protein
2022	SGM20_43687148	Chr.20	43687148	A	AT	6.15571e-08	Protein
2023	SGM20_43687148	Chr.20	43687148	A	AT	2.2052e-06	Protein
2020	SGM20_46222580	Chr.20	46222580	C	CAAGTACGGTGGAAA	3.19484e-06	Oil

## Sheet: Table S6
Table S6 Details of loci associated with seed oil and protein content traits via GWAS in soybean
Trait	years	SNP/Indel	Maker	Chromosome	Position	REF	ALT	P value	PVE	Additive effect (%)
Oil	2020	Indel	SGM03_3986531	Chr.3	3986531	AT	A	9.40252e-07	0.262162	0.267734
Oil	2022	Indel						1.52071e-06	0.314544	0.43525
Oil	2020	Indel	SGM04_2178115	Chr.4	2178115	TAGTGA	T	9.46582e-07	0.119932	0.682532
Oil	2022	Indel						1.67378e-06	0.149176	0.496083
Oil	2022	Indel	SGM04_8102921	Chr.4	8102921	T	TA	2.1082e-06	0.148727	0.0817702
Oil	2023	Indel						2.59007e-06	0.11947	0.0979034
protein	2022	Indel	SGM04_40568662	Chr.4	40568662	T	TA	1.85181e-06	0.0245922	-1.78588
protein	2023	Indel						4.68794e-07	0.0219001	-1.69874
Oil	2020	SNP	SGM05_36571289	Chr.5	36571289	C	A	7.38829e-08	0.118777	1.03038
Oil	2021	SNP						2.9733e-07	0.131843	0.887983
Oil	2020	SNP	SGM05_36574164	Chr.5	36574164	A	G	3.16875e-08	0.122947	1.06637
Oil	2021	SNP						9.01521e-10	0.137994	0.951635
Oil	2020	Indel	SGM05_36574450	Chr.5	36574450	T	TC	2.07426e-06	0.0487152	1.08378
Oil	2021	Indel						2.42933e-06	0.0585564	0.944487
Oil	2020	SNP	SGM05_36581160	Chr.5	36581160	T	C	1.00464e-07	0.133508	1.09347
Oil	2021	SNP						1.36205e-09	0.144613	0.933177
Oil	2023	SNP						2.41e-08	0.139362	1.07177
protein	2020	Indel	SGM08_15502732	Chr.8	15502732	C	CCGG	2.97766e-06	0.0145772	-1.77841
protein	2023	Indel						1.6881e-06	0.0150728	-1.78476
Oil	2023	Indel						3.93044e-07	0.05923	0.94858
protein	2022	Indel	SGM08_40104071	Chr.8	40104071	A	AAC	2.66527e-06	0.01365	-1.76993
protein	2023	Indel						1.08787e-07	0.012136	-1.92978
Oil	2020	Indel	SGM17_8335202	Chr.17	8335202	AT	A	2.04438e-07	0.0686275	0.952676
Oil	2022	Indel						2.15419e-06	0.0869219	0.827957
protein	2020	Indel						2.54984e-07	0.0170234	-1.39018
Oil	2020	Indel	SGM17_8462234	Chr.17	8462234	T	TC	1.14289e-08	0.0828365	0.926683
Oil	2022	Indel						2.88978e-06	0.102919	0.685514
Oil	2020	Indel	SGM18_48599328	Chr.18	48599328	A	AGATG	5.67206e-08	0.0585762	0.974972
Oil	2022	Indel						7.45695e-08	0.0748242	0.906776
Oil	2022	Indel	SGM18_56410929	Chr.18	56410929	C	CCTTCTTCAGTT	3.49311e-07	0.12302	0.702639
Oil	2023	Indel						1.55966e-07	0.0966531	0.735124
Oil	2022	SNP	SGM18_56414949	Chr.18	56414949	T	C	2.56143e-09	0.293817	0.685122
Oil	2023	SNP						1.67e-08	0.241599	0.737931
Oil	2020	SNP	SGM18_57241943	Chr.18	57241943	A	G	1.94459e-07	0.171977	0.950029
Oil	2022	SNP						3.20431e-08	0.213428	0.866253
Oil	2020	SNP	SGM18_57242007	Chr.18	57242007	T	C	6.07257e-08	0.166315	0.947494
Oil	2022	SNP						3.68346e-09	0.207448	0.865387
Oil	2020	SNP	SGM18_57242685	Chr.18	57242685	A	T	9.77044e-08	0.172185	0.947127
Oil	2022	SNP						2.28316e-08	0.212983	0.863906
Oil	2020	SNP	SGM18_57242802	Chr.18	57242802	C	G	2.8782e-07	0.175953	0.946653
Oil	2022	SNP						4.61428e-08	0.217756	0.864466
Oil	2020	SNP	SGM18_57243027	Chr.18	57243027	A	C	2.10969e-07	0.190865	0.873287
Oil	2022	SNP						5.14188e-08	0.233807	0.810222
Oil	2020	SNP	SGM20_232139	Chr.20	232139	T	A	2.87595e-07	0.168931	1.16446
Oil	2023	SNP						7.61e-09	0.164436	1.19404
protein	2020	SNP						2.22293e-08	0.0474034	-2.39137
protein	2022	Indel	SGM20_561785	Chr.20	561785	A	ATTTGT	3.43181e-07	0.0249819	-1.64325
protein	2023	Indel						7.86523e-07	0.0211984	-1.62026
Oil	2021	SNP	SGM20_897062	Chr.20	897062	C	T	3.43471e-08	0.3123	0.652561
Oil	2022	SNP						2.44525e-08	0.34684	0.674148
protein	2020	Indel	SGM20_2670206	Chr.20	2670206	T	TC	1.3365e-06	0.0231658	-1.54561
protein	2022	Indel						3.92837e-06	0.0263915	-1.58911
protein	2022	Indel	SGM20_12558243	Chr.20	12558243	G	GT	3.40967e-06	0.0299586	-1.62325
protein	2023	Indel						1.24496e-06	0.0265776	-1.65663
Oil	2020	SNP	SGM20_14713864	Chr.20	14713864	A	C	8.49311e-08	0.0172804	-2.10833
Oil	2022	SNP						6.95335e-09	0.0214829	-2.35833
protein	2020	SNP						1.13714e-08	0.00390242	3.63333
Oil	2020	Indel	SGM20_16829930	Chr.20	16829930	T	TA	2.89276e-07	0.103667	0.501585
Oil	2023	Indel						1.49523e-07	0.10014	0.589422
protein	2020	Indel						1.37493e-07	0.0260572	-1.34189
protein	2023	Indel						3.4745e-07	0.0260155	-1.49136
protein	2020	Indel	SGM20_19166406	Chr.20	19166406	G	GTC	2.35867e-06	0.0166832	-1.69221
protein	2022	Indel						4.36307e-07	0.0192021	-1.81951
Oil	2022	Indel	SGM20_19421831	Chr.20	19421831	C	CAA	3.85954e-06	0.0990958	0.670161
Oil	2023	Indel						5.93158e-08	0.0775579	0.737283
protein	2020	Indel						3.14776e-07	0.0196348	-1.66584
protein	2022	Indel						3.65233e-07	0.0221546	-1.89957
protein	2023	Indel						1.70432e-07	0.0197709	-1.81209
protein	2020	Indel	SGM20_19470626	Chr.20	19470626	A	AT	1.79573e-07	0.0160542	-1.69781
protein	2023	Indel						3.75617e-06	0.0164455	-1.66708
protein	2022	Indel	SGM20_20174479	Chr.20	20174479	C	CAT	3.55636e-06	0.0217563	-1.84276
protein	2023	Indel						2.00686e-06	0.0197462	-1.77894
protein	2022	Indel	SGM20_23324034	Chr.20	23324034	T	TG	1.24739e-06	0.0245088	-1.85783
protein	2023	Indel						6.42742e-07	0.0218012	-1.73972
protein	2022	Indel	SGM20_24585943	Chr.20	24585943	G	GGAA	1.79091e-06	0.0187138	-1.86825
protein	2023	Indel						4.71486e-07	0.0156923	-1.87175
Oil	2020	Indel	SGM20_43687148	Chr.20	43687148	A	AT	3.89825e-07	0.0424702	0.974687
Oil	2022	Indel						5.73953e-07	0.0540305	0.834933
protein	2020	Indel						1.58188e-06	0.0102848	-1.58587
protein	2022	Indel						6.15571e-08	0.0118273	-1.65504
protein	2023	Indel						2.2052e-06	0.0102381	-1.62211

## Sheet: Table S7
Table S7 Linkage disequilibrium decay to r2 of half by chromosomes of 334 soybean accessions
Chromosome	LD decay distance	Chromosome	LD decay distance
Chr.1	66.20 kb	Chr.11	14.10 kb
Chr.2	55.90 kb	Chr.12	43.90 kb
Chr.3	9.00 kb	Chr.13	16.30 kb
Chr.4	142.90 kb	Chr.14	61.50 kb
Chr.5	12.90 kb	Chr.15	53.30 kb
Chr.6	71.10 kb	Chr.16	61.50 kb
Chr.7	20.80 kb	Chr.17	42.40 kb
Chr.8	42.90 kb	Chr.18	54.40 kb
Chr.9	56.80 kb	Chr.19	117.10 kb
Chr.10	90.70 kb	Chr.20	36.50 kb

## Sheet: Table S8
Table S8 Candidate genes that may control oil and protein content within the QTNs regions.
QTNs	Gene ID	Start(bp)	Stop(bp)	Functional annotation in the Phytozome database	Arabidopsis homologues
qOil5-1	Glyma.05G176800	36574893	36576169	vacuolar ATP synthase catalytic subunit-related	AT1G16820.1
	Glyma.05G176900	36578278	36580080		AT1G23850.1
	Glyma.05G177000	36583698	36587213	Haloacid dehalogenase-like hydrolase (HAD) superfamily protein	AT4G39970.1
	Glyma.05G177100	36588778	36594868	DNAJ heat shock family protein	AT2G22360.1
	Glyma.05G177200	36596588	36598671	Putative membrane lipoprotein	AT1G10380.1
	Glyma.05G177300	36598533	36598770
	Glyma.05G177400	36598782	36601791	alpha/beta-Hydrolases superfamily protein	AT4G39955.1
qOil18-2	Glyma.18G282700	56360395	56373654	trithorax-like protein 2	AT1G05830.2
	Glyma.18G282800	56377928	56395985	ARM repeat superfamily protein	AT2G31660.1
	Glyma.18G282900	56659073	56660431
	Glyma.18G283100	56397323	56405619	Eukaryotic aspartyl protease family protein	AT1G05840.1
	Glyma.18G283166	56677360	56680416	Disease resistance protein (CC-NBS-LRR class) family	AT1G58390.1
	Glyma.18G283232	56677360	56680416	NB-ARC domain-containing disease resistance protein	AT3G46530.1
	Glyma.18G283300	56411520	56416642	Protein phosphatase 2C family protein	AT3G02750.1
	Glyma.18G283400	56423007	56426460	Chitinase family protein	AT1G05850.1
	Glyma.18G283500	56428413	56430831	ROP-interactive CRIB motif-containing protein 4	AT5G16490.1
	Glyma.18G283600	56435985	56437478	Exostosin family protein	AT4G13990.1
	Glyma.18G283700	56440957	56442558	Exostosin family protein	AT2G29040.1
	Glyma.18G283800	56445016	56451963	Protein of unknown function (DUF1664)	AT1G24265.2
	Glyma.18G283900	56453767	56460708	zinc ion binding;nucleic acid binding;hydrolases	AT1G48360.2
	Glyma.18G284000	56735190	56740835	Transducin/WD40 repeat-like superfamily protein	AT5G56190.1
qOil18-3	Glyma.18G294200	57469776	57470569	seed storage 2S albumin superfamily protein	AT3G18280.1
	Glyma.18G294300	57477820	57484025	Class I glutamine amidotransferase-like superfamily protein	AT5G38200.1
	Glyma.18G294400	57481410	57489775	cysteine-rich RLK (RECEPTOR-like protein kinase) 5	AT4G23130.2
	Glyma.18G294600	57496122	57496917	Protein kinase superfamily protein	AT5G38260.1
	Glyma.18G294800	57491565	57504078	Protein kinase family protein	AT5G38210.1
	Glyma.18G294900	57508079	57508978	50S ribosomal protein-related	AT5G16200.1
	Glyma.18G295000	57513533	57527589	ortholog of maize chloroplast splicing factor CRS1	AT5G16180.1
	Glyma.18G295100	57533651	57535707	bidirectional sugar transporter Sweet9	AT2G39060.1
	Glyma.18G295200	57263175	57264609	Core-2/I-branching beta-1,6-N-acetylglucosaminyltransferase family protein	AT5G16170.1
	Glyma.18G295300	57266694	57272529	plastidic GLC translocator	AT5G16150.2
	Glyma.18G295400	57275027	57277706	Pentatricopeptide repeat (PPR) superfamily protein	AT5G65560.1
	Glyma.18G295500	57283068	57284069	zinc finger protein 6	AT1G67030.1
	Glyma.18G295600	57285881	57288957	Peptidyl-tRNA hydrolase family protein	AT5G16140.2
	Glyma.18G295700	57562295	57563243		AT1G67035.2
	Glyma.18G295800	57563608	57569187	phosphatidylinositol n-acetylglucosaminyltransferase subunit p down syndrome critical region protein 5	AT1G67040.1
	Glyma.18G295900	57577439	57578728		AT1G67050.1
	Glyma.18G296100	57587133	57591237	RNA-binding (RRM/RBD/RNP motifs) family protein	AT2G43370.1
	Glyma.18G296200	57592486	57596633	Peptidase M50B-like	AT1G67060.1
qOP20-1	Glyma.20G001800	200929	204636		AT2G41610.1
	Glyma.20G001900	205474	209603	K-box region and MADS-box transcription factor family protein	AT5G23260.2
	Glyma.20G002000	213184	219283	Major facilitator superfamily protein	AT4G00370.1
	Glyma.20G002100	219510	223899
	Glyma.20G002200	226435	228121	D111/G-patch domain-containing protein	AT1G33520.1
	Glyma.20G002301	228580	231565	transcription factor jumonji (jmj) family protein / zinc finger (C5HC2 type) family protein	AT5G46910.1
	Glyma.20G002400	235327	239972	DNAJ heat shock N-terminal domain-containing protein	AT5G23240.1
	Glyma.20G002500	241013	241717	Arabidopsis protein of unknown function (DUF241)	AT1G76210.1
	Glyma.20G002700	250193	254045	cytochrome P450, family 86, subfamily B, polypeptide 1	AT5G23190.1
	Glyma.20G002800	259703	260884		AT5G08240.1
	Glyma.20G002900	262922	282744	myosin XI D;Myosin family protein with Dil domain	AT2G33240.1
qOil20-1	Glyma.20G009900	862084	864118	ARM repeat superfamily protein	AT4G33945.1
	Glyma.20G010000	867234	868634	Cupredoxin superfamily protein	AT2G15780.1
	Glyma.20G010100	872822	877464	Tetratricopeptide repeat (TPR)-like superfamily protein	AT5G39710.1
	Glyma.20G010200	884079	885412	Protein of unknown function (DUF1645)	AT2G15760.1
	Glyma.20G010400	892561	893715	ENTH/VHS/GAT family protein	AT1G25240.1
	Glyma.20G010500	893064	894475
	Glyma.20G010600	896859	900923	Pentatricopeptide repeat (PPR-like) superfamily protein	AT5G13770.1
	Glyma.20G010800	903484	914877	tobamovirus multiplication protein 3	AT2G02180.1
	Glyma.20G010900	918287	921967	Thebaine 6-O-demethylase	AT1G17020.1
	Glyma.20G011000	924449	929975	2-oxoglutarate (2OG) and Fe(II)-dependent oxygenase superfamily protein	AT4G25310.1
	Glyma.20G011100	931628	933315	Pleckstrin-homology domain (PH domain)/Phosphotyrosine-binding domain (PTB)	AT5G08350.1
	Glyma.20G011200	936894	938832	Pleckstrin-homology domain (PH domain)/Phosphotyrosine-binding domain (PTB)	AT5G08350.1
	Glyma.20G011300	941548	942425	Glycine rich protein family (GRP)

## Sheet: Table S9
Table S9 Expression pattern of candidate genes for five QTNs in seed development and different tissues base on RNA-seq data (Gmax_508_Wm82.a4.v1.gene_atlas_v2.meanExpression.FPKM)
QTNs	GeneID	seed.seed_s1	seed.seed_s2	seed.seed_s3	seed.seed_s4	seed.seed_s5	seed.seed_s6	seed.seed_s7	seed.seed_s8	seed.seed_s9	flower.open	leaf.standard	root.standard	stem.standard	shoot_tip.standard
qOil5-1	Glyma.05G176800	0	0	0	0	0	0	0	0	0	0	0	0.064	0	0
	Glyma.05G176900	0	0	0.011	0	0.011	0	0.013	0	0	0.693	1.358	0.263	1.056	0.478
	Glyma.05G177000	8.44	5.774	3.733	2.348	1.235	1.139	1.132	0.235	0.225	8.042	40.435	2.038	16.338	15.722
	Glyma.05G177100	4.308	3.578	2.808	2.454	2.309	2.208	15.147	16.678	12.505	5.835	10.909	2.241	4.28	6.266
	Glyma.05G177200	0.857	0.772	1.185	1.962	2.483	1.784	0.553	0.57	0.903	1.473	1.297	0.972	2.373	0.609
	Glyma.05G177300	0	0	0	0	0	0	0	0	0	0.069	0	0	0	0
	Glyma.05G177400	2.016	1.69	0.813	0.795	0.79	0.405	3.07	2.594	1.92	2.037	2.616	0.423	1.643	1.913
qOil18-2	Glyma.18G282700	7.412	7.291	3.905	5.436	3.731	3.13	9.153	7.166	6.335	10.788	9.428	10.212	6.092	9.526
	Glyma.18G282800	10.595	10.954	10.123	6.774	7.839	6.56	32.084	34.415	26.42	22.67	9.795	15.887	20.951	19.405
	Glyma.18G282900	0.187	0.956	0.344	0.29	0.175	0.285	2.435	1.638	0.574	0.702	0.476	0.162	0.113	0.441
	Glyma.18G283100	8.885	9.927	6.465	5.871	5.882	6.676	17.135	19.951	17.586	12.426	5.62	9.073	5.553	6.303
	Glyma.18G283166	0	0	0	0	0	0	0	0	0	0	0	0	0	0
	Glyma.18G283232	0	0	0	0	0	0	0	0	0	0	0	0	0	0
	Glyma.18G283300	3.334	3.176	2.144	2.552	2.243	2.236	7.052	7.906	5.878	6.615	4.432	12.781	7.128	6.968
	Glyma.18G283400	80.43	98.263	105.133	84.917	96.563	105.061	85.568	95.465	82.303	69.08	99.359	106.914	328.28	127.733
	Glyma.18G283500	0.875	0.506	1.706	1.399	0.667	0.676	0	0	0	0.374	0.677	1.59	8.44	0.905
	Glyma.18G283600	0.036	0	0	0	0	0	0	0	0	0.092	0.135	0	0.243	1.819
	Glyma.18G283700	0.025	0	0	0	0	0	0	0	0	0.044	0.017	0.007	0.356	0.035
	Glyma.18G283800	26.016	18.277	11.957	12.622	11.101	9.57	15.631	15.109	14.627	13.851	13.497	11.512	9.996	11.984
	Glyma.18G283900	4.078	2.484	1.479	1.015	0.968	0.826	2.908	1.961	2.156	3.846	4.398	1.152	1.752	6.627
	Glyma.18G284000	32.251	19.103	14.559	13.546	11.555	11.083	11.072	5.595	4.6	21.473	28.299	17.726	24.142	21.095
qOil18-3	Glyma.18G294200	59.974	125.733	46.056	19.186	0.545	0.297	3.388	0.121	0.311	143.824	17.317	123.944	494.907	103.307
	Glyma.18G294300	0.043	0.232	0.246	0.169	0.166	0.236	0.368	0.026	0.462	1.262	0.007	16.335	0	0.017
	Glyma.18G294400	0.052	0.03	0	0	0.007	0.003	0.006	0	0	0.338	0.18	1.421	0.068	0.158
	Glyma.18G294600	0.045	0.206	0	0	0.021	0	0.026	0	0	0.174	0.313	11.541	0.194	0.138
	Glyma.18G294800	0.903	0.766	0.247	0.16	0.123	0.118	0.003	0.009	0	0.232	0.159	4.357	0.145	0.193
	Glyma.18G294900	0.861	0.641	0.527	0.344	0.241	0.325	0.28	0.103	0.164	1.063	1.626	0.216	1.088	0.808
	Glyma.18G295000	1.857	2.16	1.236	1.272	0.887	1.002	3.65	2.682	2.546	3.087	4.531	0.53	1.692	3.256
	Glyma.18G295100	0.503	0	0	0	0	0	4.015	0	0	3.817	0	0	0	0
	Glyma.18G295200	1.541	0.017	0	0	0	0	0.015	0	0.022	0.034	0	0	0	0
	Glyma.18G295300	3.141	3.33	2.503	2.301	2.048	1.782	1.461	0.805	0.723	4.581	8.693	3.322	3.333	4.336
	Glyma.18G295400	1.641	1.943	1.703	1.26	1.211	0.828	1.62	1.195	0.965	1.121	1.298	1.122	1.235	1.379
	Glyma.18G295500	0.116	0.04	0.04	0.086	0.055	0.039	0	0	0.062	0.602	0.021	1.349	0.43	0.046
	Glyma.18G295600	10.181	14.099	9.981	10.533	8.119	9.03	57.983	67.387	58.746	10.395	25.133	2.826	8.306	14.208
	Glyma.18G295700	26.147	7.62	1.703	1.606	0.711	0.138	0.344	0.418	0.367	4.558	26.445	4.91	13.217	17.344
	Glyma.18G295800	12.959	10.606	4.15	2.642	1.676	1.259	0.476	0.046	0.008	8.838	21.626	2.039	7.403	22.217
	Glyma.18G295900	2.824	2.742	1.102	1.469	1.094	2.188	0.219	0	0	2.381	2.859	0.484	0.537	5.902
	Glyma.18G296100	4.494	4.511	3.028	3.666	3.222	3.516	5.908	3.98	2.874	4.718	3.443	1.312	3.643	5.185
	Glyma.18G296200	6.667	3.27	1.1	0.687	0.7	0.522	0.469	0.208	0.109	8.539	11.285	27.818	14.57	7.815
qOP20-1	Glyma.20G001800	0	0.649	8.16	0.813	0.058	0.007	0.008	0	0	0.099	0.246	0.194	1.338	0.403
	Glyma.20G001900	1.41	1.216	0.326	0.236	0	0.034	0	0	0	2.281	0	0	0	0
	Glyma.20G002000	4.364	6.601	5.344	9.511	9.023	12.598	22.464	11.831	10.677	1.635	5.638	0.019	3.024	1.783
	Glyma.20G002100	0.899	3.37	3.123	3.729	2.722	2.618	0.336	0.122	0.031	0.481	0.919	0.729	1.888	1.538
	Glyma.20G002200	7.989	6.215	5.424	6.597	6.832	9.101	21.115	22.135	21.208	6.915	7.251	7.901	4.215	5.456
	Glyma.20G002301	0.045	0	0.014	0.021	0	0	0	0	0.025	0.056	0	0.016	0	0
	Glyma.20G002400	0.102	0.111	0.336	0.22	0.059	0.274	0.53	0.353	0.17	13.659	2.252	0.021	0.734	2.936
	Glyma.20G002500	0	0	0	0	0	0	0	0.045	0	0	0.02	0.086	0	0
	Glyma.20G002700	3.472	3.961	2.651	3.181	3.466	3.693	0.285	0.251	0.391	0.736	1.57	0	0.873	12.542
	Glyma.20G002800	0.045	0	0	0	0	0	0.013	0	0	0.32	0	1.118	0.053	0.044
	Glyma.20G002900	0.115	0.168	0.099	0.055	0.053	0.121	0.014	0.004	0	0.315	0.094	0.037	0.058	0.14
qOil20-1	Glyma.20G009900	0	0	0	0	0	0	0	0	0	0.029	0	0	0	0
	Glyma.20G010000	0.018	0	0.071	0	0.033	0	0	0	0	0.033	0	65.931	0.477	0.041
	Glyma.20G010100	2.164	2.027	1.293	1.151	1.258	1.572	5.651	7.103	7.561	1.87	2.208	0.698	0.931	1.784
	Glyma.20G010200	0.188	0.306	0.044	0.085	0.072	0.145	0.017	0	0	0.304	0.093	0.974	0.373	0.106
	Glyma.20G010400	0.046	0.046	0	0.044	0	0	0.037	0	0.085	0.63	0.034	0	0.037	0.024
	Glyma.20G010500	0.04	0.533	0.043	0	0	0	0.325	0.293	0	0.413	0.357	0	0.19	0.091
	Glyma.20G010600	1.371	4.457	0.876	0.735	0.404	0.202	1.834	0.507	0.639	5.904	12.225	0.071	3.124	8.3
	Glyma.20G010800	12.131	7.347	4.183	3.589	3.534	3.72	11.23	9.214	11.482	10.53	10.621	7.612	10.03	15.38
	Glyma.20G010900	0	0	0	0	0	0	0.107	0	0	0.08	0.014	22.026	0	0
	Glyma.20G011000	0	0	0	0	0	0	0.036	0	0	0.502	0.057	0.117	0.105	0.022
	Glyma.20G011100	0	0	0	0	0	0	0	0	0	0.422	0.046	0	0.013	0.087
	Glyma.20G011200	0	0	0	0.024	0	0.052	0	0	0	0.012	0	0.025	0	0
	Glyma.20G011300	0	0.131	0	0.022	0.188	14.258	173.979	72.481	51.587	0	0	0	0	0
